# Supplementary material for: Tuning Photophysical Properties by p-Functional Groups in Zn(II) and Cd(II) Complexes with Piperonylic Acid
Source: MDPI journal article supplement (doi:10.3390/molecules27041365), 2022-02-17
Supplement: s1 [file s1]

# **Tuning photophysical properties by *p*-functional groups in Zn(II) and Cd(II) complexes with piperonylic acid**

## **Supporting Information**

*Francisco Sánchez-Férez<sup>a</sup>, Joaquim M<sup>a</sup> Rius-Bartra<sup>a</sup>, José A. Ayllón<sup>a</sup>, Teresa Calvet<sup>b</sup>,  
Mercè Font-Bardia<sup>c</sup>, Josefina Pons<sup>a,\*</sup>*

<sup>a</sup>Departament de Química, Universitat Autònoma de Barcelona, 08193-Bellaterra,  
Barcelona, Spain

<sup>b</sup>Departament de Mineralogia, Petrologia i Geologia Aplicada, Universitat de Barcelona,  
Martí i Franquès s/n, 08028 Barcelona, Spain.

<sup>c</sup>Unitat de Difracció de Raig-X, Centres Científics i Tecnològics de la Universitat de  
Barcelona (CCiTUB), Universitat de Barcelona, Solé i Sabarís, 1-3, 08028 Barcelona,  
Spain

## Tables Caption

|                                                                                                                                                      |    |
|------------------------------------------------------------------------------------------------------------------------------------------------------|----|
| Table S1. Geometry distortions analysis using <i>S</i> parameter calculated with SHAPE <sup>1,2</sup> .....                                          | 4  |
| Table S2. Geometry distortions analysis using <i>S</i> parameter calculated with SHAPE <sup>1,2</sup> of optimized geometries in MeOH solvation..... | 4  |
| Table S3. Cartesian coordinates from X-ray and optimized geometry of <b>1</b> in MeOH.....                                                           | 21 |
| Table S4. Cartesian coordinates from X-ray and optimized geometry of the monomer present in <b>2</b> in MeOH.....                                    | 23 |
| Table S5. Cartesian coordinates from X-ray and optimized geometry of the dimer present in <b>2</b> in MeOH.....                                      | 26 |
| Table S6. Cartesian coordinates from X-ray and optimized geometry of <b>3</b> in MeOH.....                                                           | 29 |
| Table S7. Cartesian coordinates from X-ray and optimized geometry of <b>4</b> in MeOH.....                                                           | 33 |

## Figures Caption

|                                                                                                                                                                                                                                                                                                 |    |
|-------------------------------------------------------------------------------------------------------------------------------------------------------------------------------------------------------------------------------------------------------------------------------------------------|----|
| Figure S1. FTIR-ATR spectrum of [Zn( $\mu$ -Pip) <sub>2</sub> (4-acpy)] <sub>2</sub> ( <b>1</b> ).....                                                                                                                                                                                          | 5  |
| Figure S2. FTIR-ATR spectrum of [Zn( $\mu$ -Pip)(Pip)(isn) <sub>2</sub> ] <sub>2</sub> ·2[Zn(Pip) <sub>2</sub> (HPip)(isn)]·2MeOH ( <b>2</b> ).<br>.....                                                                                                                                        | 5  |
| Figure S3. FTIR-ATR spectrum of [Cd( $\mu$ -Pip)(Pip)(4-acpy)] <sub>2</sub> ( <b>3</b> ).....                                                                                                                                                                                                   | 6  |
| Figure S4. FTIR-ATR spectrum of [Cd( $\mu$ -Pip)(Pip)(isn) <sub>2</sub> ] <sub>2</sub> ( <b>4</b> ).....                                                                                                                                                                                        | 6  |
| Figure S5. <sup>1</sup> H NMR spectrum of [Zn( $\mu$ -Pip) <sub>2</sub> (4-acpy)] <sub>2</sub> ( <b>1</b> ) recorded in dmsd-d <sub>6</sub> at 298K.....                                                                                                                                        | 7  |
| Figure S6. <sup>1</sup> H NMR spectrum of [Zn( $\mu$ -Pip)(Pip)(isn) <sub>2</sub> ] <sub>2</sub> ·2[Zn(Pip) <sub>2</sub> (HPip)(isn)]·2MeOH ( <b>2</b> ) recorded in dmsd-d <sub>6</sub> at 298K.....                                                                                           | 8  |
| Figure S7. <sup>1</sup> H NMR spectrum of [Cd( $\mu$ -Pip)(Pip)(4-acpy)] <sub>2</sub> ( <b>3</b> ) recorded in dmsd-d <sub>6</sub> at 298K... ..                                                                                                                                                | 8  |
| Figure S8. <sup>1</sup> H NMR spectrum of [Cd( $\mu$ -Pip)(Pip)(isn) <sub>2</sub> ] <sub>2</sub> ( <b>4</b> ) recorded in dmsd-d <sub>6</sub> at 298K.....                                                                                                                                      | 9  |
| Figure S9. <sup>13</sup> C{ <sup>1</sup> H} (top) and DEPT-135 (bottom) NMR spectra of [Zn( $\mu$ -Pip) <sub>2</sub> (4-acpy)] <sub>2</sub> ( <b>1</b> ) recorded in dmsd-d <sub>6</sub> at 298K.....                                                                                           | 10 |
| Figure S10. <sup>13</sup> C{ <sup>1</sup> H} (top) and DEPT-135 (bottom) NMR spectra of [Zn( $\mu$ -Pip)(Pip)(isn) <sub>2</sub> ] <sub>2</sub> ·2[Zn(Pip) <sub>2</sub> (HPip)(isn)]·2MeOH ( <b>2</b> ) recorded in dmsd-d <sub>6</sub> at 298K. ....                                            | 11 |
| Figure S11. <sup>13</sup> C{ <sup>1</sup> H} NMR spectrum of [Cd( $\mu$ -Pip)(Pip)(4-acpy)] <sub>2</sub> ( <b>3</b> ) recorded in dmsd-d <sub>6</sub> at 298K.....                                                                                                                              | 12 |
| Figure S12. <sup>13</sup> C{ <sup>1</sup> H} NMR spectra of [Cd( $\mu$ -Pip)(Pip)(isn) <sub>2</sub> ] <sub>2</sub> ( <b>4</b> ) recorded in dmsd-d <sub>6</sub> at 298K.<br>.....                                                                                                               | 12 |
| Figure S13. Solid state photoluminescence spectrum of complex <b>1</b> under excitation at 326 nm.<br>.....                                                                                                                                                                                     | 13 |
| Figure S14. Experimental (blue line), calculated (dashed black line) UV-Vis spectra and oscillator strengths of [Zn( $\mu$ -Pip) <sub>2</sub> (4-acpy)] <sub>2</sub> ( <b>1</b> ).....                                                                                                          | 13 |
| Figure S15. Experimental (blue line), calculated (dashed black line) UV-Vis spectra and oscillator strengths of [Cd( $\mu$ -Pip)(Pip)(4-acpy)] <sub>2</sub> ( <b>3</b> ).....                                                                                                                   | 14 |
| Figure S16. Experimental (blue line), calculated (dashed black line) UV-Vis spectra and oscillator strengths of [Cd( $\mu$ -Pip)(Pip)(isn) <sub>2</sub> ] <sub>2</sub> ( <b>4</b> ).....                                                                                                        | 14 |
| Figure S17. Energy diagram of HOMO-LUMO gaps of complexes <b>1-4</b> . From left to right, complexes <b>1</b> , monomer in <b>2</b> , dimer in <b>2</b> , <b>3</b> and <b>4</b> . ....                                                                                                          | 15 |
| Figure S18. Molecular orbitals representation for the selected electronic transition states (TS) of complex <b>1</b> . Oscillator strength values ( <i>f</i> ): TS4, 0.4367; TS5, 0.4366; TS8, 0.1865; TS19, 0.3567; TS35, 0.4426; TS37, 1.4664; TS49, 1.2782; TS51, 1.1540; TS60, 2.2567. .... | 16 |
| Figure S19. Molecular orbitals representation for the selected electronic transition states (TS) of the monomer in complex <b>2</b> . Oscillator strength values ( <i>f</i> ): TS1, 0.2001; TS4, 0.2458; TS7,                                                                                   |    |

|                                                                                                                                                                                                                                                                                                                                            |    |
|--------------------------------------------------------------------------------------------------------------------------------------------------------------------------------------------------------------------------------------------------------------------------------------------------------------------------------------------|----|
| 0.1148; TS20, 0.1680; TS44, 0.3544; TS47, 0.4349; TS51, 0.2862; TS55, 0.5419; TS56, 0.5041; TS57, 0.3833. ....                                                                                                                                                                                                                             | 17 |
| Figure S20. Molecular orbitals representation for the selected electronic transition states (TS) of the dimer in complex <b>2</b> . Oscillator strength values ( <i>f</i> ): TS1, 0.4391; TS5, 0.3018; TS6, 0.0894; TS11, 0.0886; TS20, 0.1015; TS41, 0.8745; TS44, 0.1579; TS53, 0.2004; TS73, 0.3385; TS75, 0.4664; TS78, 0.4614. ....   | 17 |
| Figure S21. Molecular orbitals representation for the selected electronic transition states (TS) of complex <b>3</b> . Oscillator strength values ( <i>f</i> ): TS5, 0.3176; TS6, 0.1106; TS9, 0.4499; TS16, 0.1119; TS19, 0.0951; TS23, 0.0647; TS32, 0.3452; TS33, 0.0680; TS56, 0.0301. ....                                            | 18 |
| Figure S22. Molecular orbitals representation for the selected electronic transition states (TS) of complex <b>4</b> . Oscillator strength values ( <i>f</i> ): TS1, 0.4340; TS6, 0.4243; TS17, 0.0972; TS23, 0.0743; TS24, 0.1117; TS45, 0.2965; TS47, 0.3544; TS55, 0.3980; TS56, 0.1695; TS57, 0.1686; TS74, 0.5762; TS78, 0.2031. .... | 18 |
| Figure S23. NTOs representation of selected electronic transition states in complex <b>1</b> . ....                                                                                                                                                                                                                                        | 19 |
| Figure S24. NTOs representation of selected electronic transition states in the monomer of complex <b>2</b> . ....                                                                                                                                                                                                                         | 19 |
| Figure S25. NTOs representation of selected electronic transition states in the dimer of complex <b>2</b> . ....                                                                                                                                                                                                                           | 20 |
| Figure S26. NTOs representation of selected electronic transition states in complex <b>3</b> . ....                                                                                                                                                                                                                                        | 20 |
| Figure S27. NTOs representation of selected electronic transition states in complex <b>4</b> . ....                                                                                                                                                                                                                                        | 20 |
| Figure S28. Optimized geometry of <b>1</b> in MeOH solution with labelling scheme. ....                                                                                                                                                                                                                                                    | 23 |
| Figure S29. Optimized geometry of the monomer present in <b>2</b> in MeOH solution with labelling scheme. ....                                                                                                                                                                                                                             | 26 |
| Figure S30. Optimized geometry of the dimer present in <b>2</b> in MeOH solution with labelling scheme. ....                                                                                                                                                                                                                               | 29 |
| Figure S31. Optimized geometry of <b>3</b> in MeOH solution with labelling scheme. ....                                                                                                                                                                                                                                                    | 33 |
| Figure S32. Optimized geometry of <b>4</b> in MeOH solution with labelling scheme. ....                                                                                                                                                                                                                                                    | 36 |

## Geometry analysis

Table S1. Geometry distortions analysis using *S* parameter calculated with SHAPE<sup>1,2</sup>

| <i>Compound</i> |             | <i>Geometry</i> <sup>a</sup> | <i>S value</i> |
|-----------------|-------------|------------------------------|----------------|
| <b>1</b>        |             | TBPY-5                       | 5.681          |
|                 |             | SPY-5                        | <b>0.240</b>   |
| <b>2</b>        | <b>Zn1A</b> | TPR-6                        | 10.960         |
|                 |             | OC-6                         | <b>2.769</b>   |
|                 | <b>Zn1B</b> | TPR-6                        | 8.780          |
|                 |             | OC-6                         | <b>3.801</b>   |
| <b>3</b>        | <b>Cd1A</b> | PBPY-7                       | <b>2.215</b>   |
|                 |             | CTPR-7                       | 6.892          |
|                 |             | COC-7                        | 8.128          |
|                 | <b>Cd1B</b> | PBPY-7                       | <b>2.448</b>   |
|                 |             | CTPR-7                       | 6.337          |
|                 |             | COC-7                        | 8.431          |
| <b>4</b>        | <b>Cd1A</b> | PBPY-7                       | <b>2.015</b>   |
|                 |             | CTPR-7                       | 6.739          |
|                 |             | COC-7                        | 7.991          |
|                 | <b>Cd1B</b> | PBPY-7                       | <b>1.995</b>   |
|                 |             | CTPR-7                       | 6.748          |
|                 |             | COC-7                        | 8.058          |

Closer values have been highlighted in bold. <sup>a</sup>TBPY-5 = Trigonal bipyramidal; SPY-5 = Square pyramidal; PBPY-7 = Pentagonal bipyramidal; CTPR-7 = Capped trigonal prismatic; COC-7 = Capped octahedral; TPR-6 = Trigonal prismatic; OC-6 = Octahedral; PPY-6 = Pentagonal pyramidal.

Table S2. Geometry distortions analysis using *S* parameter calculated with SHAPE<sup>1,2</sup> of optimized geometries in MeOH solvation.

| <i>Compound</i> |             | <i>Geometry</i> <sup>a</sup> | <i>S value</i> |
|-----------------|-------------|------------------------------|----------------|
| <b>1</b>        |             | TBPY-5                       | 5.625          |
|                 |             | SPY-5                        | <b>0.181</b>   |
| <b>2</b>        | <b>Zn1A</b> | TPR-6                        | 14.038         |
|                 |             | OC-6                         | <b>2.311</b>   |
|                 | <b>Zn1B</b> | TPR-6                        | <b>8.571*</b>  |
|                 |             | OC-6                         | 9.778*         |
| <b>3</b>        | <b>Cd1A</b> | PBPY-7                       | <b>2.048</b>   |
|                 |             | CTPR-7                       | 6.707          |
|                 |             | COC-7                        | 8.165          |
|                 | <b>Cd1B</b> | PBPY-7                       | <b>1.889</b>   |
|                 |             | CTPR-7                       | 7.452          |
|                 |             | COC-7                        | 9.118          |
| <b>4</b>        | <b>Cd1A</b> | PBPY-7                       | <b>3.367</b>   |
|                 |             | CTPR-7                       | 5.519          |
|                 |             | COC-7                        | 6.776          |
|                 | <b>Cd1B</b> | PBPY-7                       | <b>2.288</b>   |
|                 |             | CTPR-7                       | 5.611          |
|                 |             | COC-7                        | 7.769          |

Closer values have been highlighted in bold. <sup>a</sup>TBPY-5 = Trigonal bipyramidal; SPY-5 = Square pyramidal; PBPY-7 = Pentagonal bipyramidal; CTPR-7 = Capped trigonal prismatic; COC-7 = Capped octahedral; TPR-6 = Trigonal prismatic; OC-6 = Octahedral; PPY-6 = Pentagonal pyramidal. \*Most significant geometric changes.

## FTIR-ATR spectra

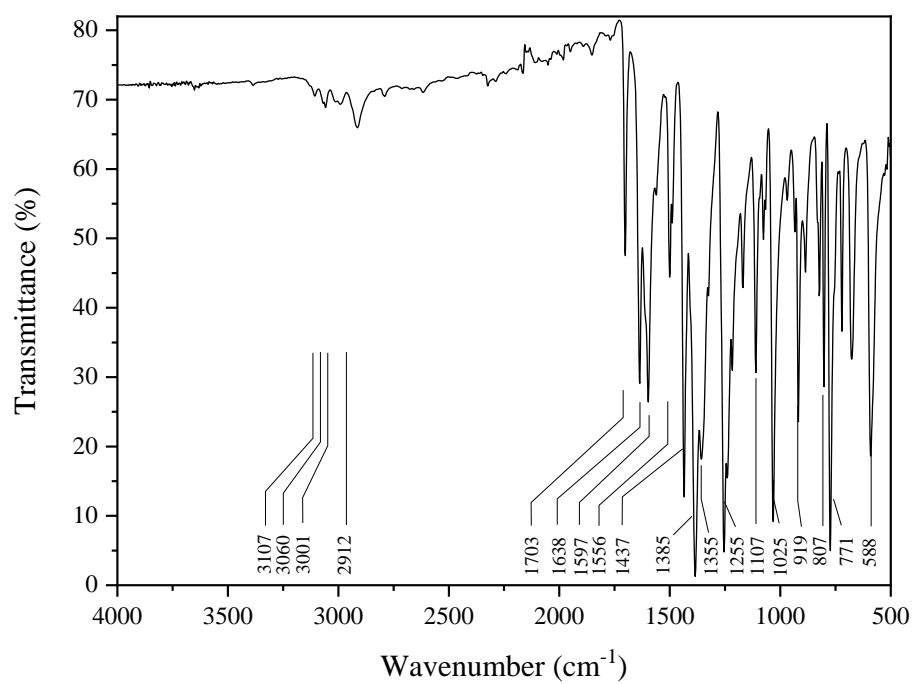

Figure S1. FTIR-ATR spectrum of  $[\text{Zn}(\mu\text{-Pip})_2(4\text{-acpy})]_2$  (**1**).

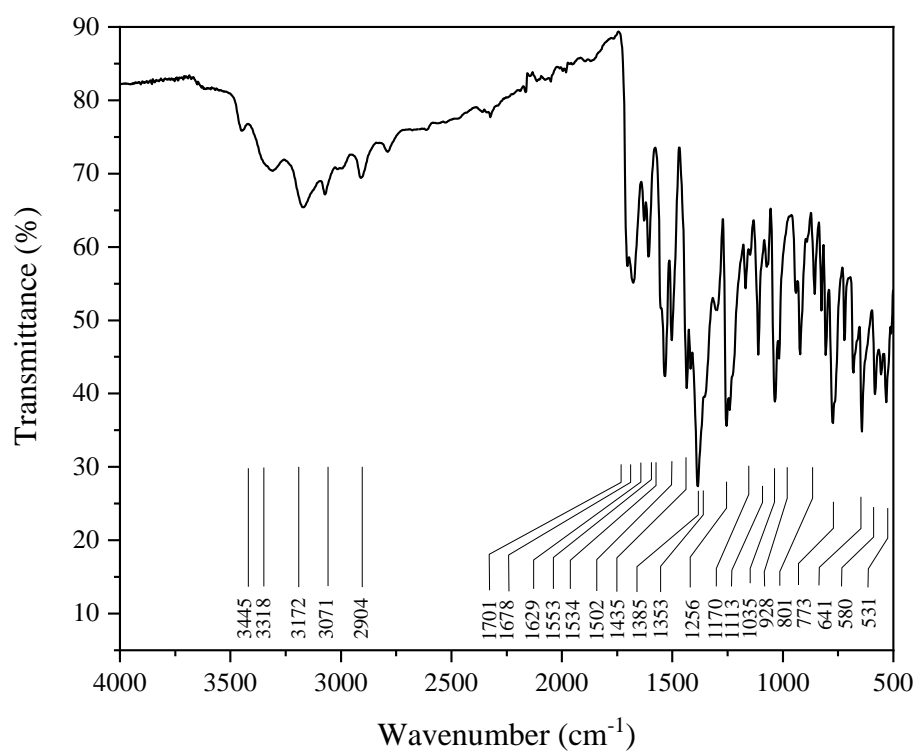

Figure S2. FTIR-ATR spectrum of  $[\text{Zn}(\mu\text{-Pip})(\text{Pip})(\text{isn})_2]_2 \cdot 2[\text{Zn}(\text{Pip})_2(\text{HPip})(\text{isn})] \cdot 2\text{MeOH}$  (**2**).

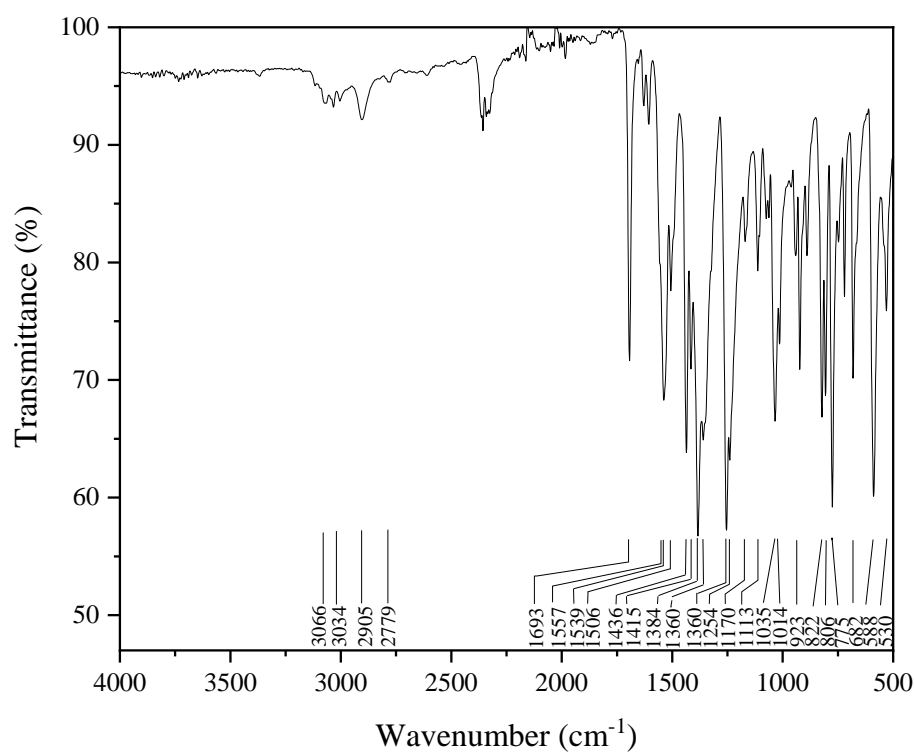

Figure S3. FTIR-ATR spectrum of  $[\text{Cd}(\mu\text{-Pip})(\text{Pip})(4\text{-acpy})_2]_2$  (**3**).

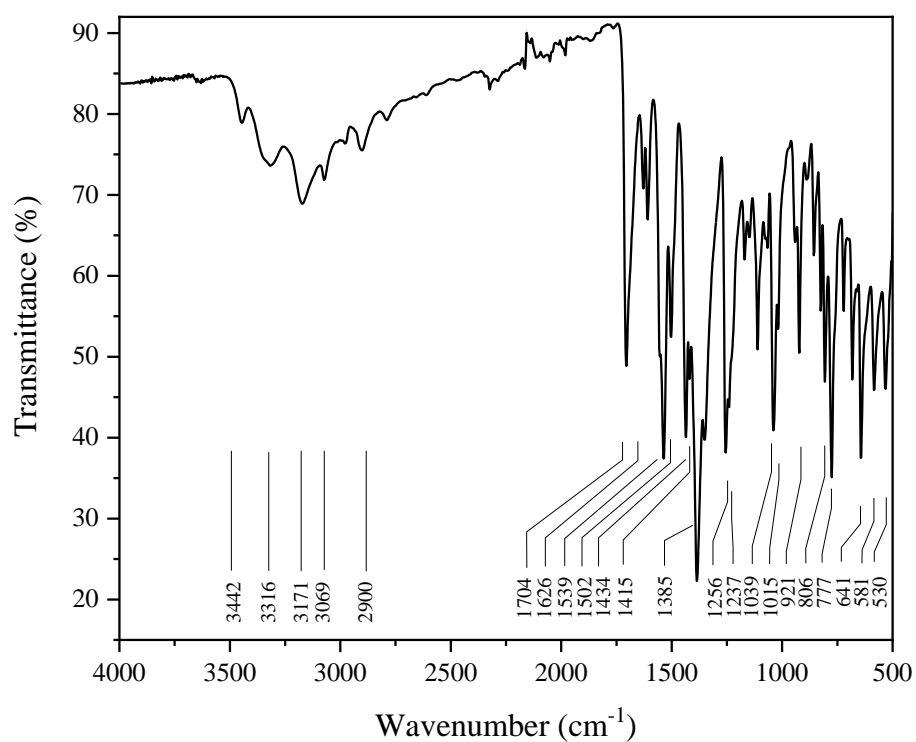

Figure S4. FTIR-ATR spectrum of  $[\text{Cd}(\mu\text{-Pip})(\text{Pip})(\text{isn})_2]_2$  (**4**).

# <sup>1</sup>H NMR spectroscopy

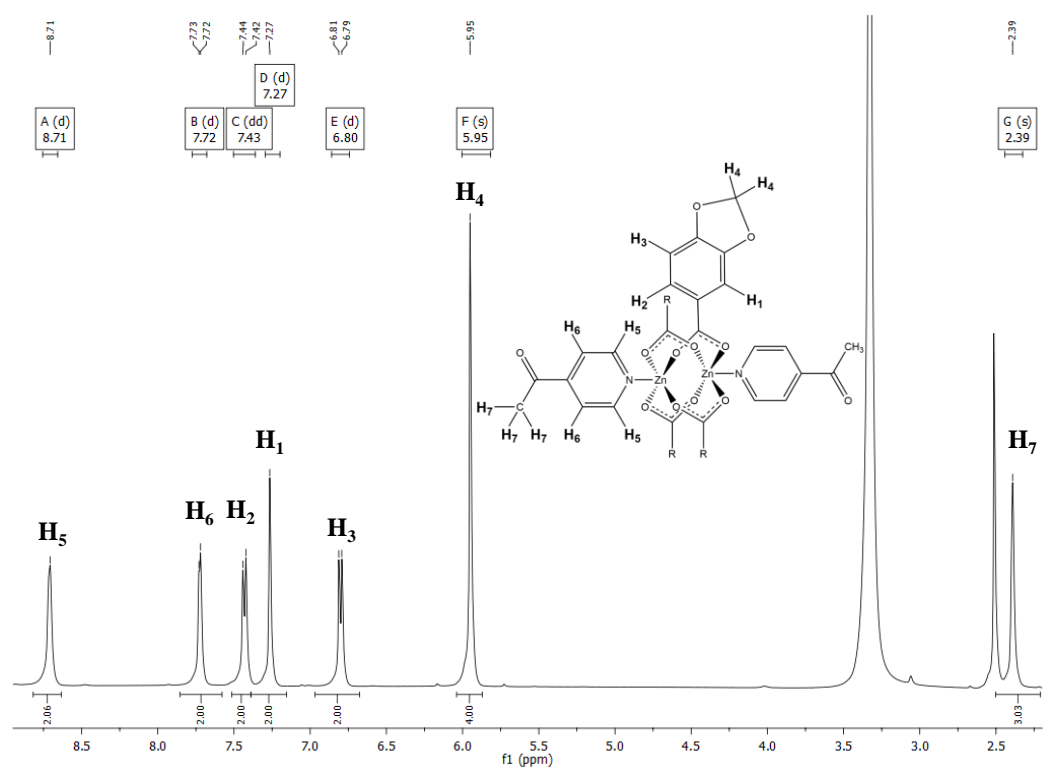

Figure S5. <sup>1</sup>H NMR spectrum of [Zn(μ-Pip)<sub>2</sub>(4-acpy)]<sub>2</sub> (1) recorded in dms0-d<sub>6</sub> at 298K.

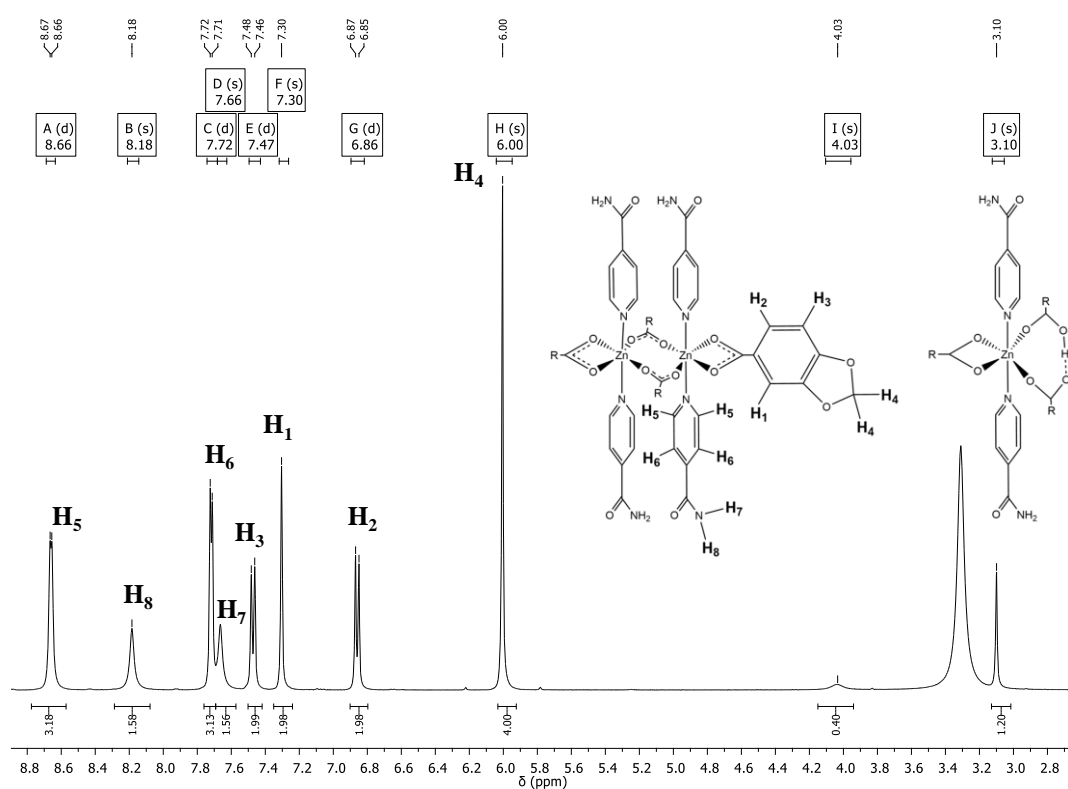

Figure S6. <sup>1</sup>H NMR spectrum of  $[\text{Zn}(\mu\text{-Pip})(\text{Pip})(\text{isn})_2]_2 \cdot 2[\text{Zn}(\text{Pip})_2(\text{HPIP})(\text{isn})] \cdot 2\text{MeOH}$  (**2**) recorded in  $\text{dmsO-}d_6$  at 298K.

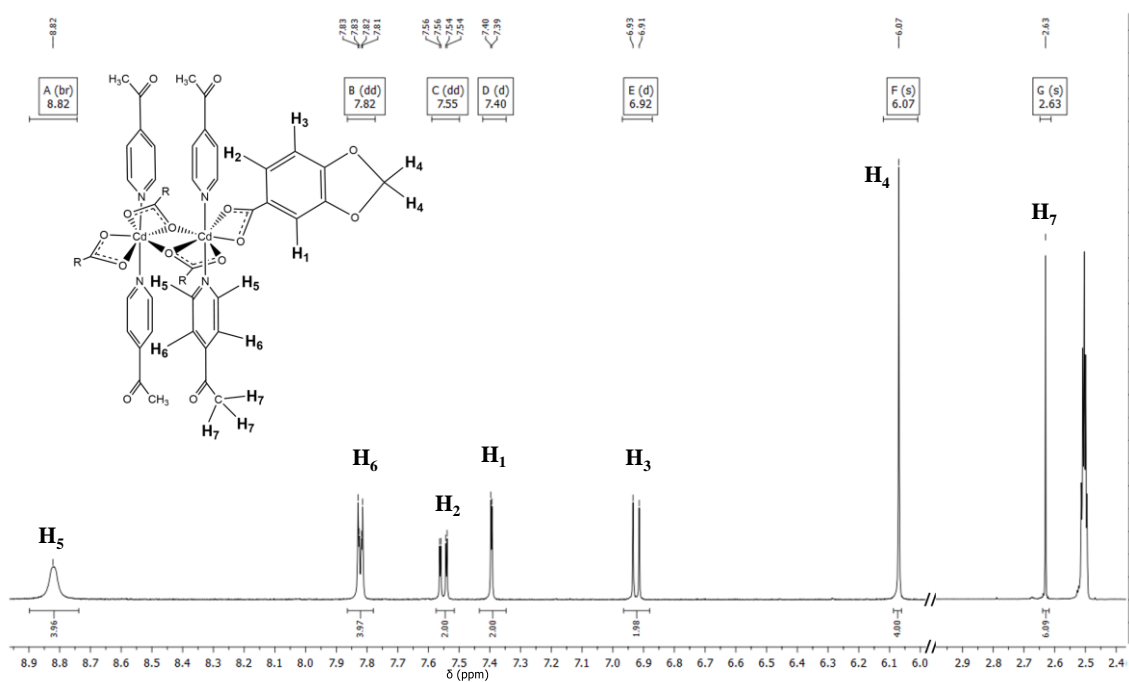

Figure S7. <sup>1</sup>H NMR spectrum of  $[\text{Cd}(\mu\text{-Pip})(\text{Pip})(4\text{-acpy})_2]_2$  (**3**) recorded in  $\text{dmsO-}d_6$  at 298K.



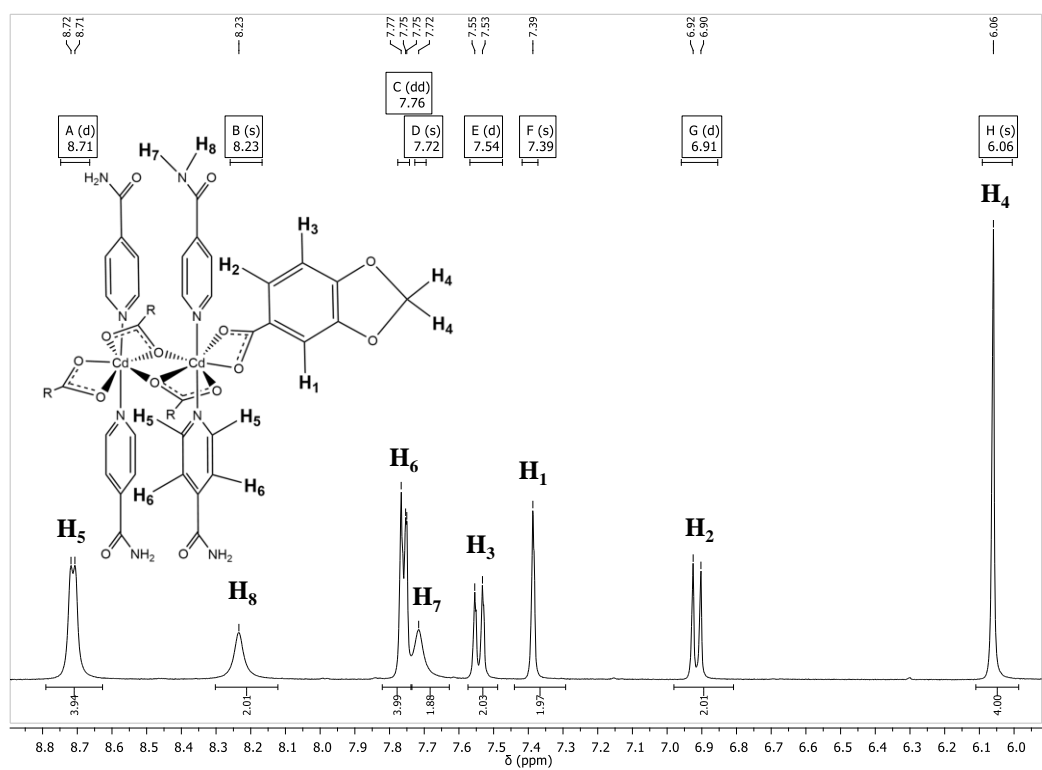

Figure S8.  $^1\text{H}$  NMR spectrum of  $[\text{Cd}(\mu\text{-Pip})(\text{Pip})(\text{isn})_2]_2$  (**4**) recorded in  $\text{dms0-}d_6$  at 298K.

**$^{13}\text{C}\{^1\text{H}\}$  and DEPT-135 NMR spectra**

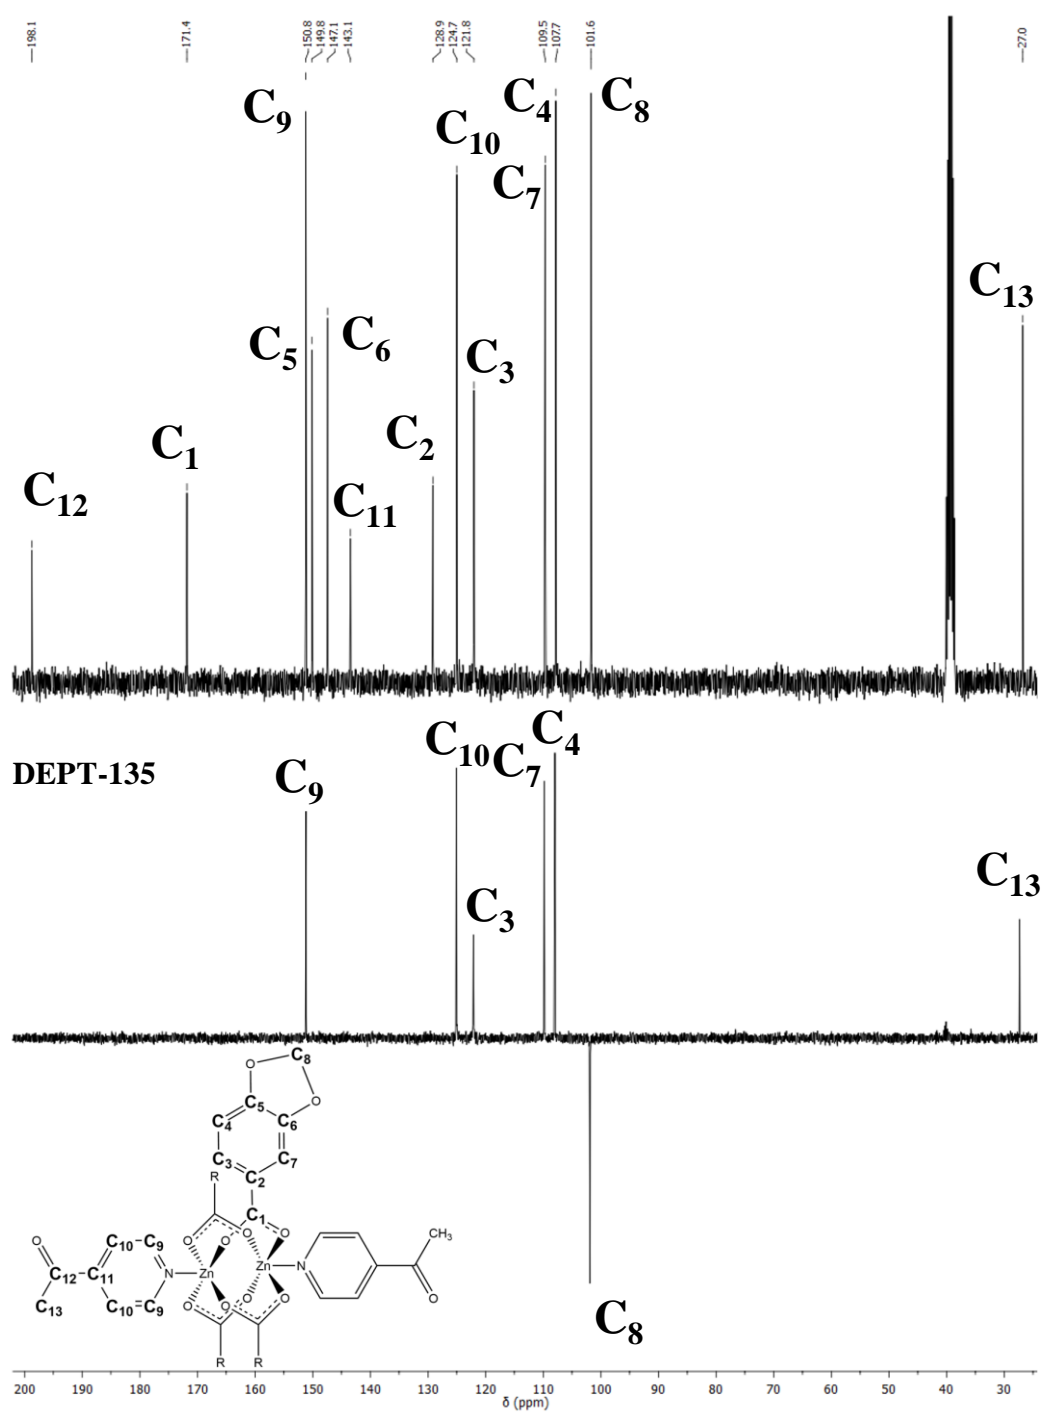

Figure S9.  $^{13}\text{C}\{^1\text{H}\}$  (top) and DEPT-135 (bottom) NMR spectra of  $[\text{Zn}(\mu\text{-Pip})_2(4\text{-acpy})]_2$  (**1**) recorded in  $\text{dms-}d_6$  at 298K.

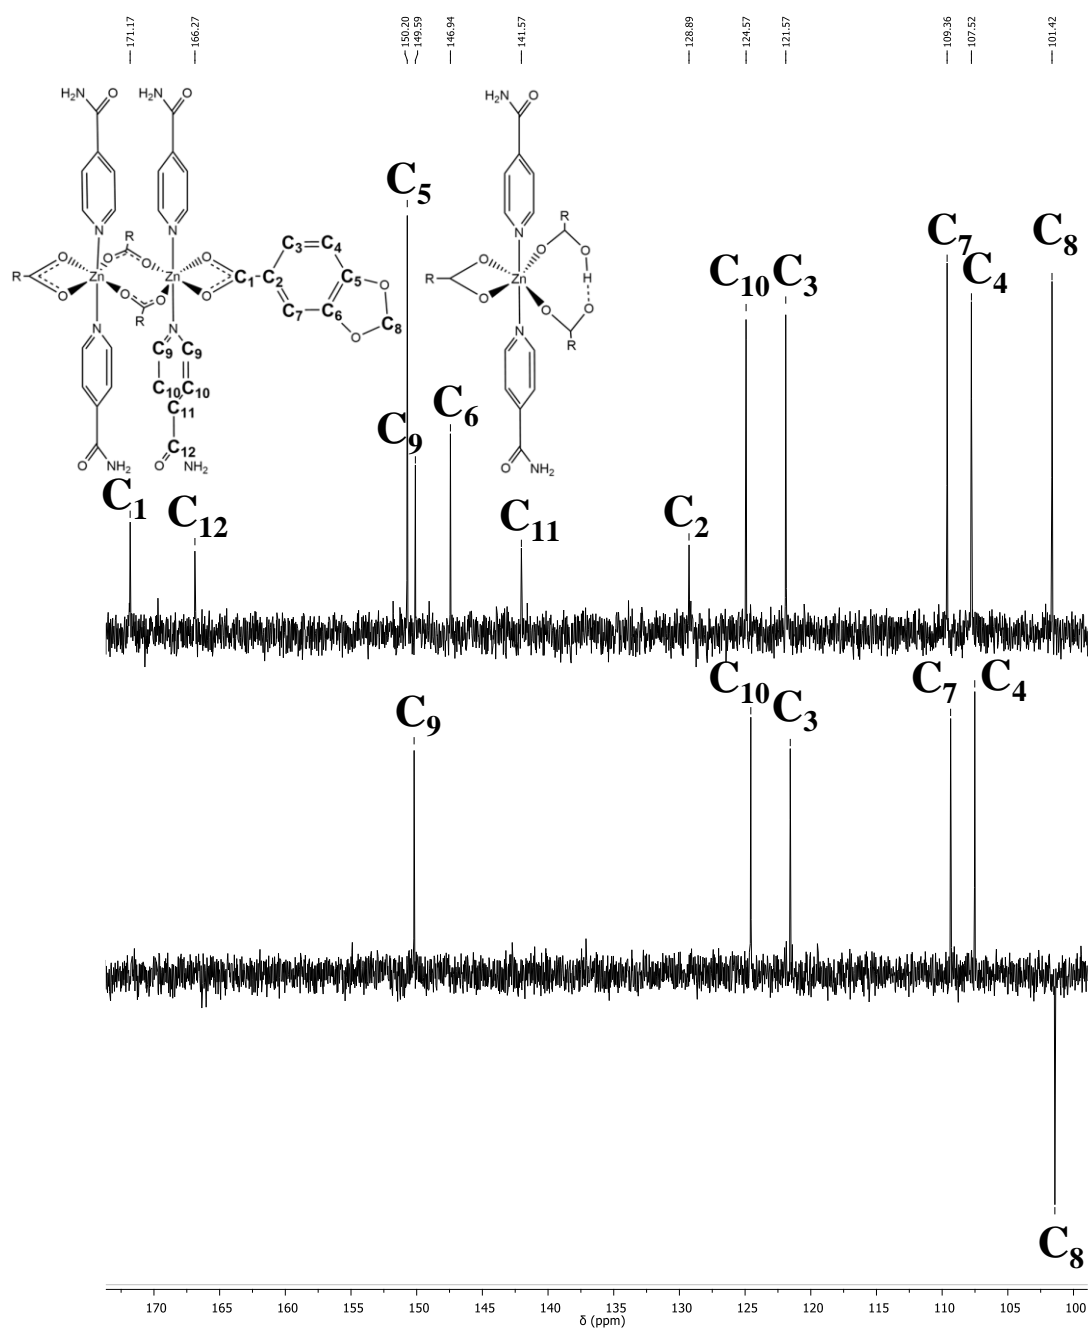

Figure S10.  $^{13}\text{C}\{^1\text{H}\}$  (top) and DEPT-135 (bottom) NMR spectra of  $[\text{Zn}(\mu\text{-Pip})(\text{Pip})(\text{isn})_2]_2 \cdot 2[\text{Zn}(\text{Pip})_2(\text{HPip})(\text{isn})] \cdot 2\text{MeOH}$  (**2**) recorded in  $\text{dms-}d_6$  at 298K.

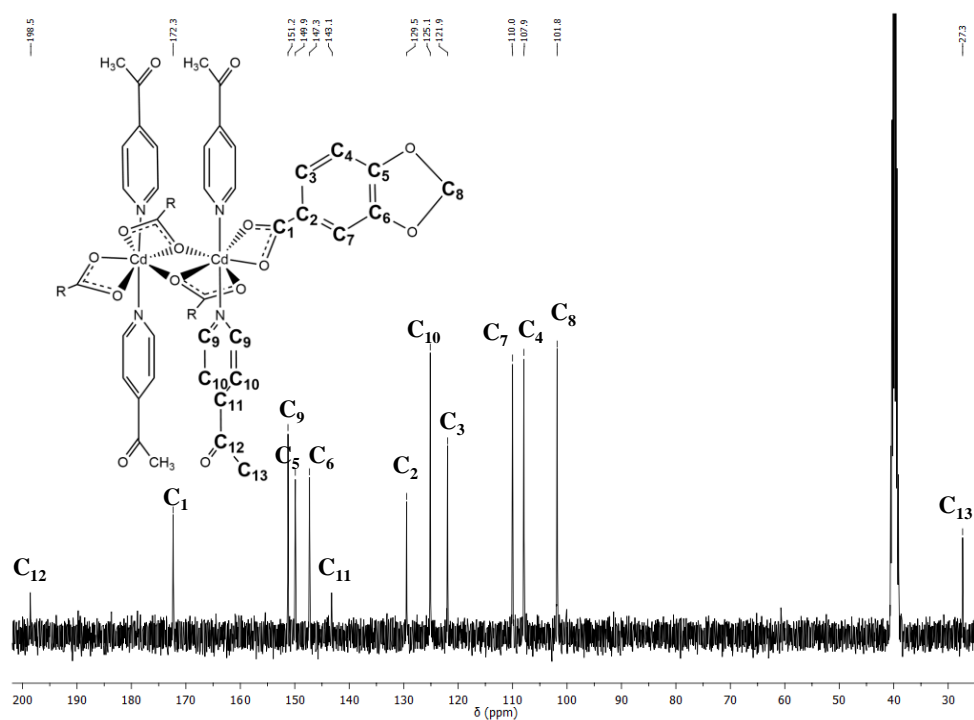

Figure S11.  $^{13}\text{C}\{^1\text{H}\}$  NMR spectrum of  $[\text{Cd}(\mu\text{-Pip})(\text{Pip})(4\text{-acpy})_2]_2$  (**3**) recorded in  $\text{dms-}d_6$  at 298K.

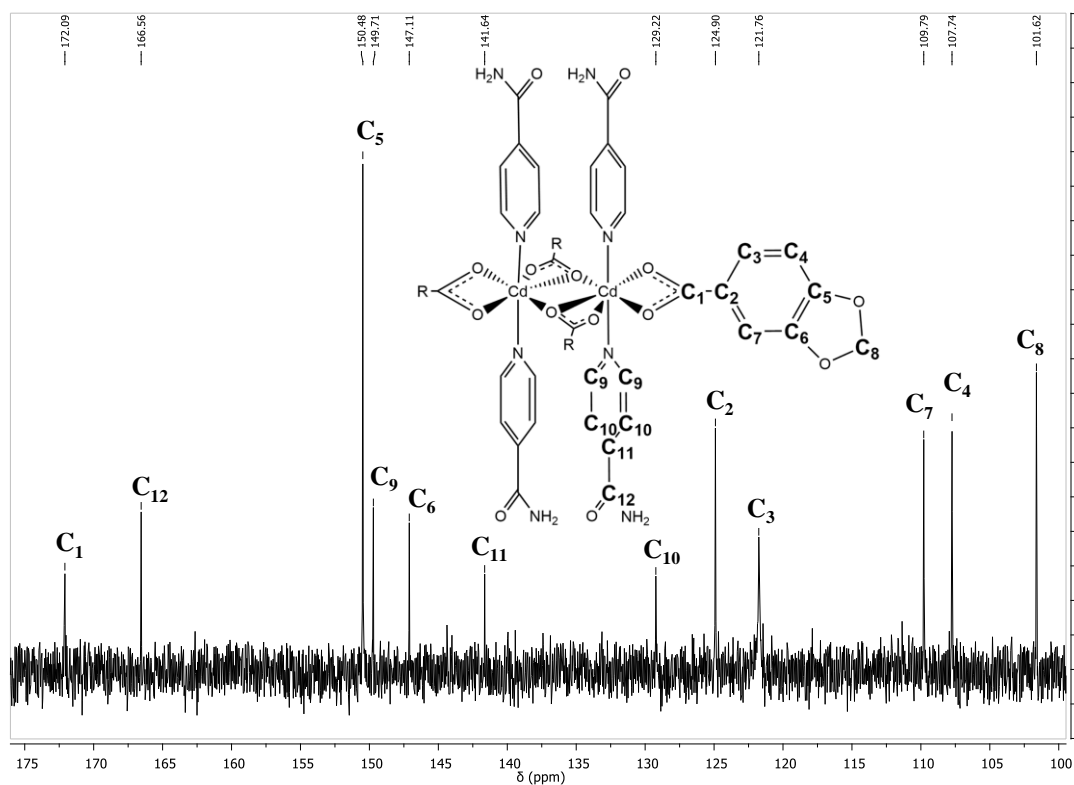

Figure S12.  $^{13}\text{C}\{^1\text{H}\}$  NMR spectra of  $[\text{Cd}(\mu\text{-Pip})(\text{Pip})(\text{isn})_2]_2$  (**4**) recorded in  $\text{dms-}d_6$  at 298K.

### Solid state photoluminescence

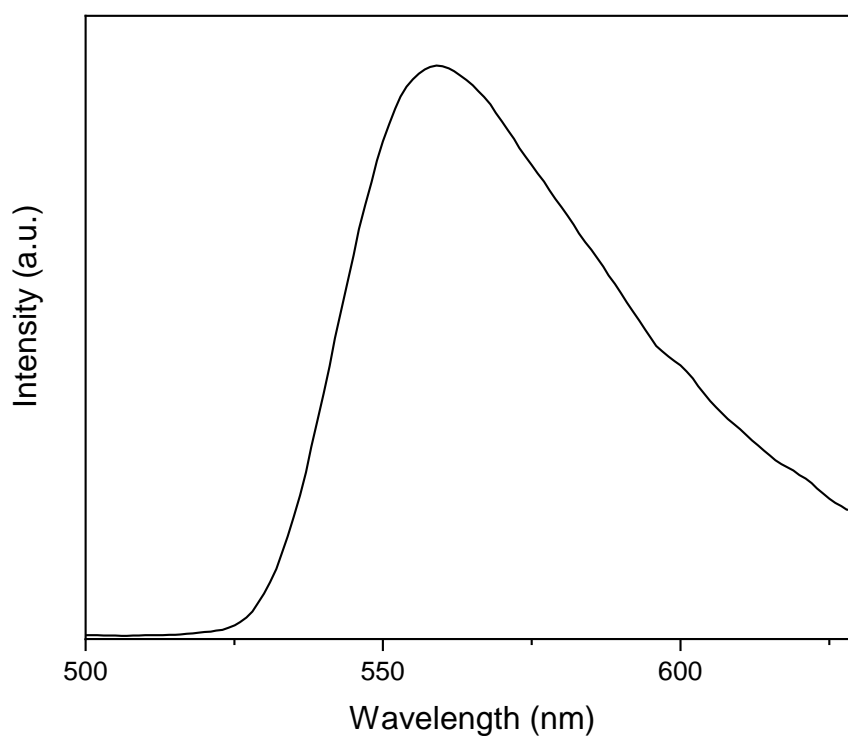

Figure S13. Solid state photoluminescence spectrum of complex **1** under excitation at 326 nm.

### Electronic calculations

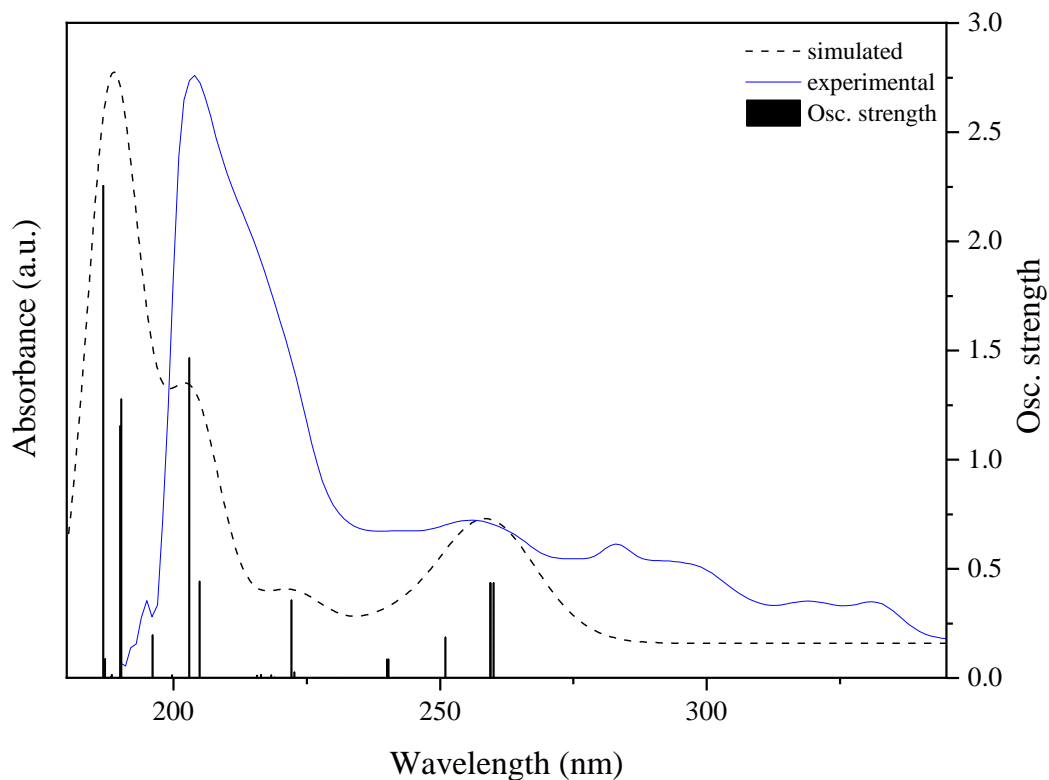

Figure S14. Experimental (blue line), calculated (dashed black line) UV-Vis spectra and oscillator strengths of  $[\text{Zn}(\mu\text{-Pip})_2(4\text{-acpy})]_2$  (**1**).

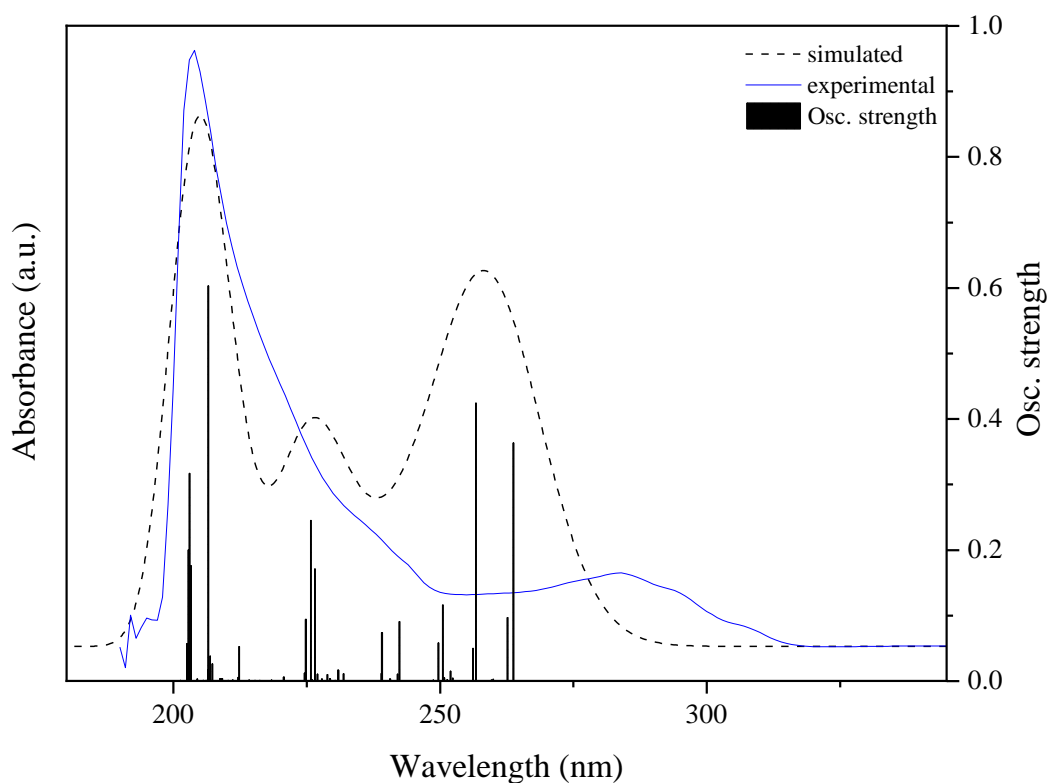

Figure S15. Experimental (blue line), calculated (dashed black line) UV-Vis spectra and oscillator strengths of  $[\text{Cd}(\mu\text{-Pip})(\text{Pip})(4\text{-acpy})_2]_2$  (**3**).

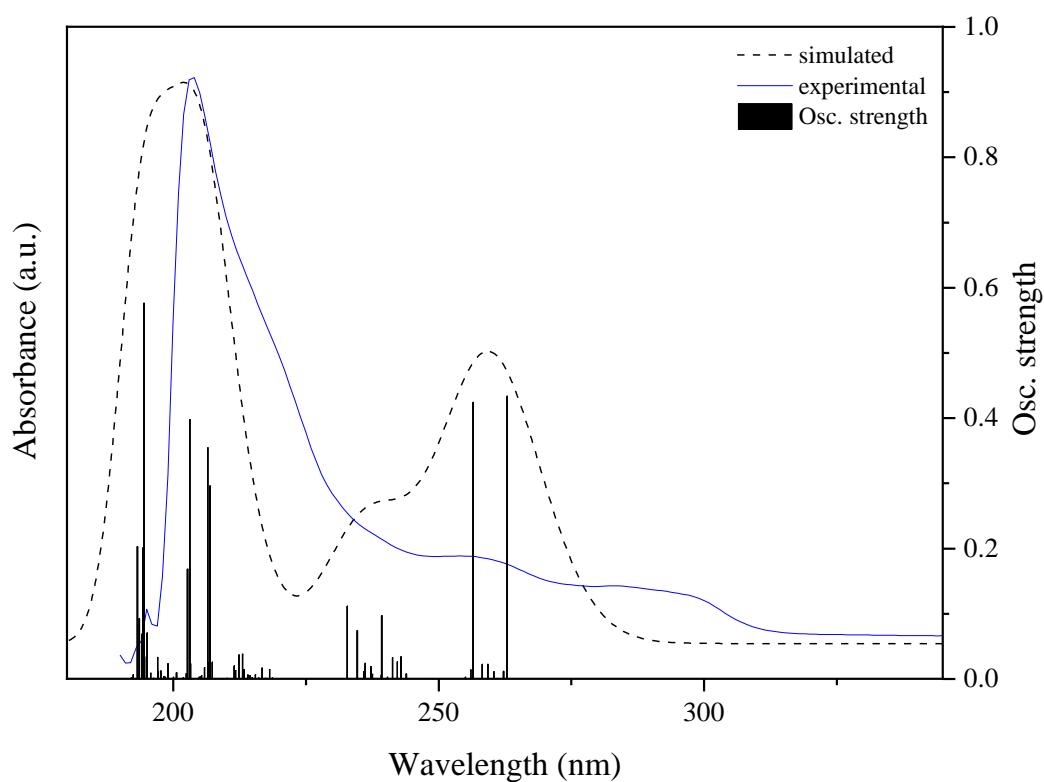

Figure S16. Experimental (blue line), calculated (dashed black line) UV-Vis spectra and oscillator strengths of  $[\text{Cd}(\mu\text{-Pip})(\text{Pip})(\text{isn})_2]_2$  (**4**).

## HOMO-LUMO gaps

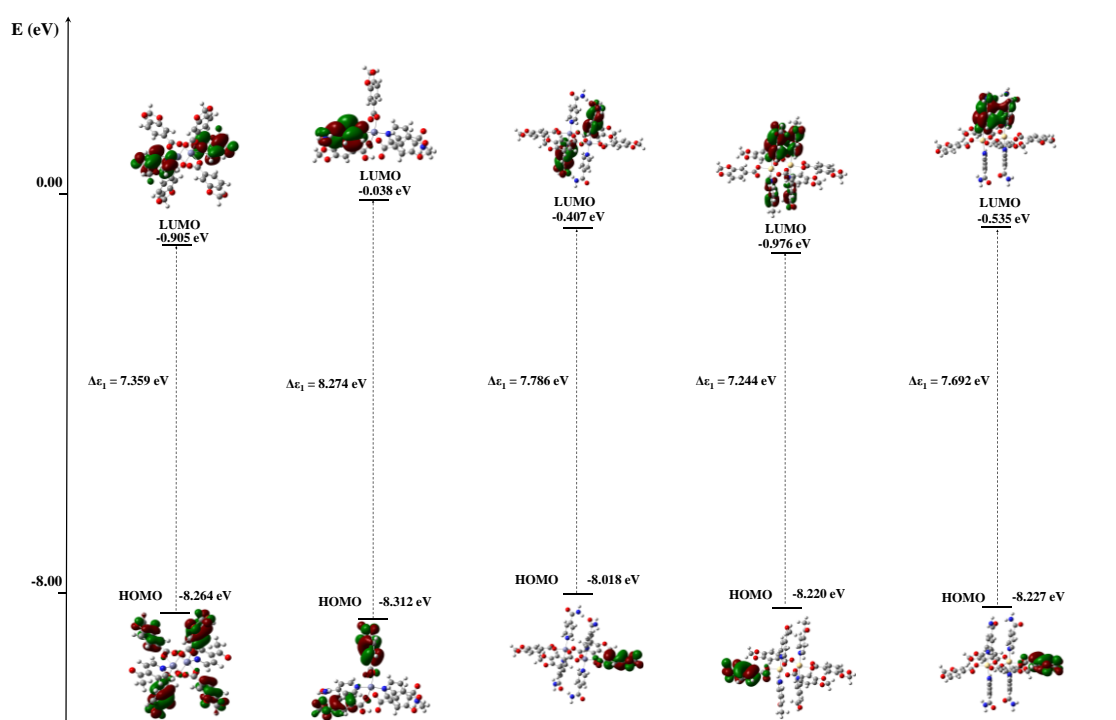

Figure S17. Energy diagram of HOMO-LUMO gaps of complexes **1-4**. From left to right, complexes **1**, monomer in **2**, dimer in **2**, **3** and **4**.

## MOs representation

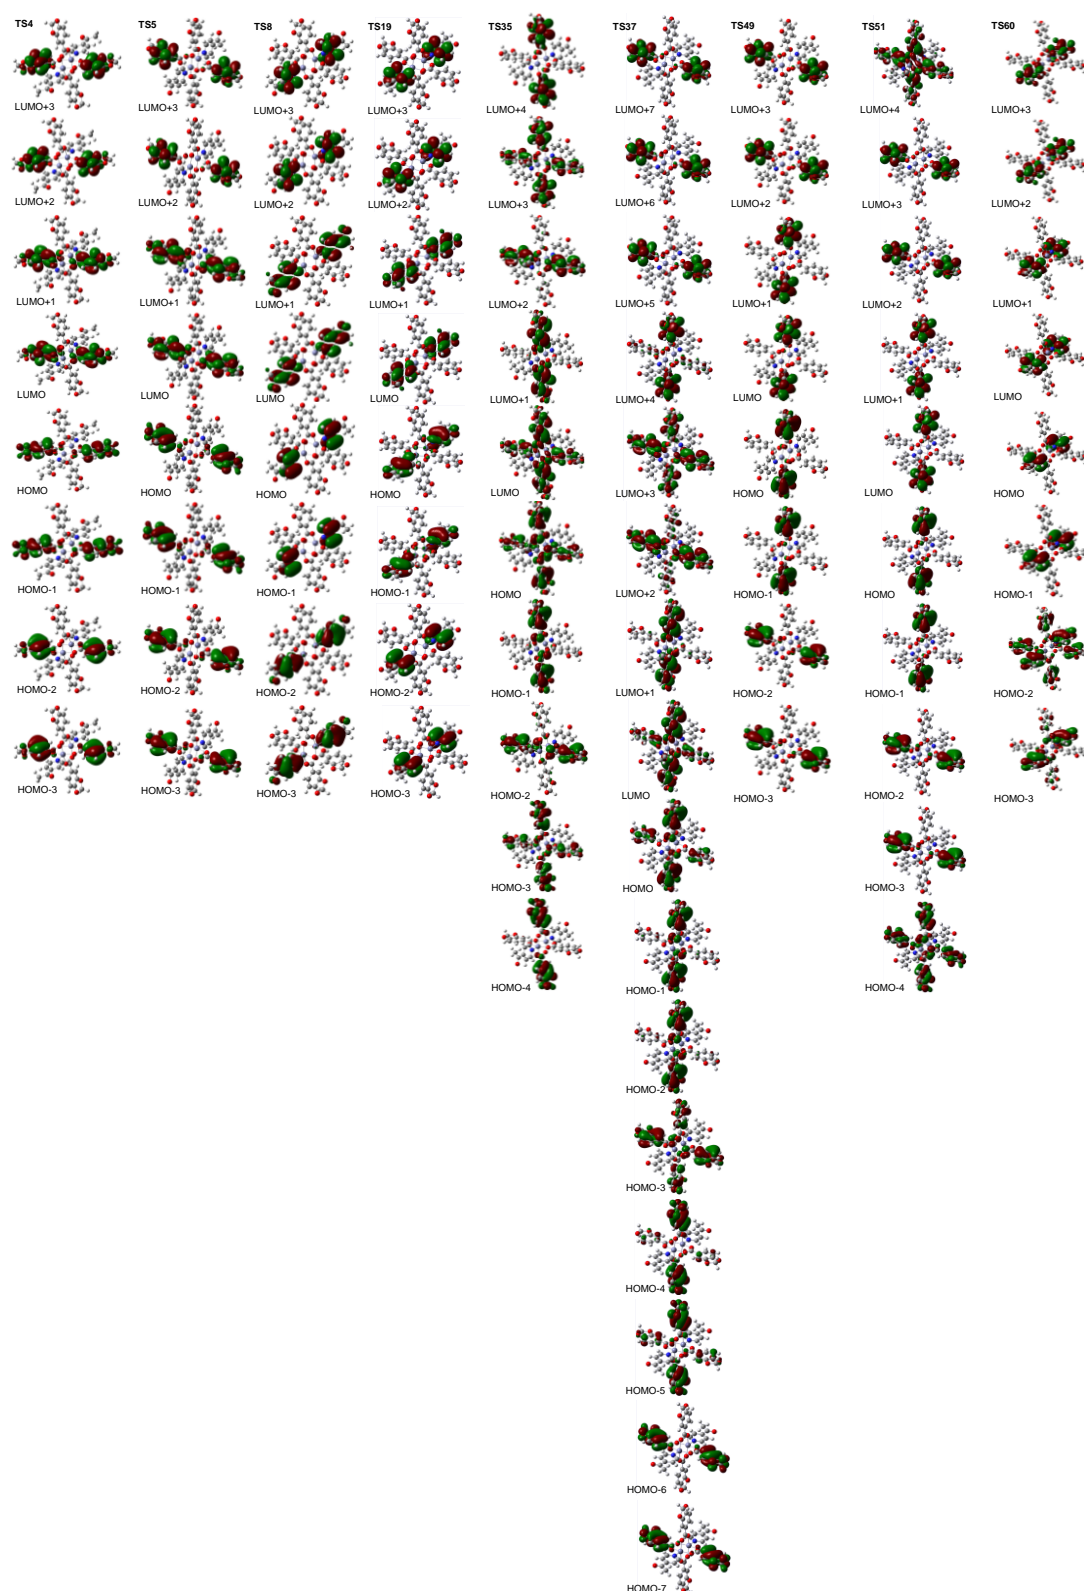

Figure S18. Molecular orbitals representation for the selected electronic transition states (TS) of complex **1**. Oscillator strength values ( $f$ ): TS4, 0.4367; TS5, 0.4366; TS8, 0.1865; TS19, 0.3567; TS35, 0.4426; TS37, 1.4664; TS49, 1.2782; TS51, 1.1540; TS60, 2.2567.



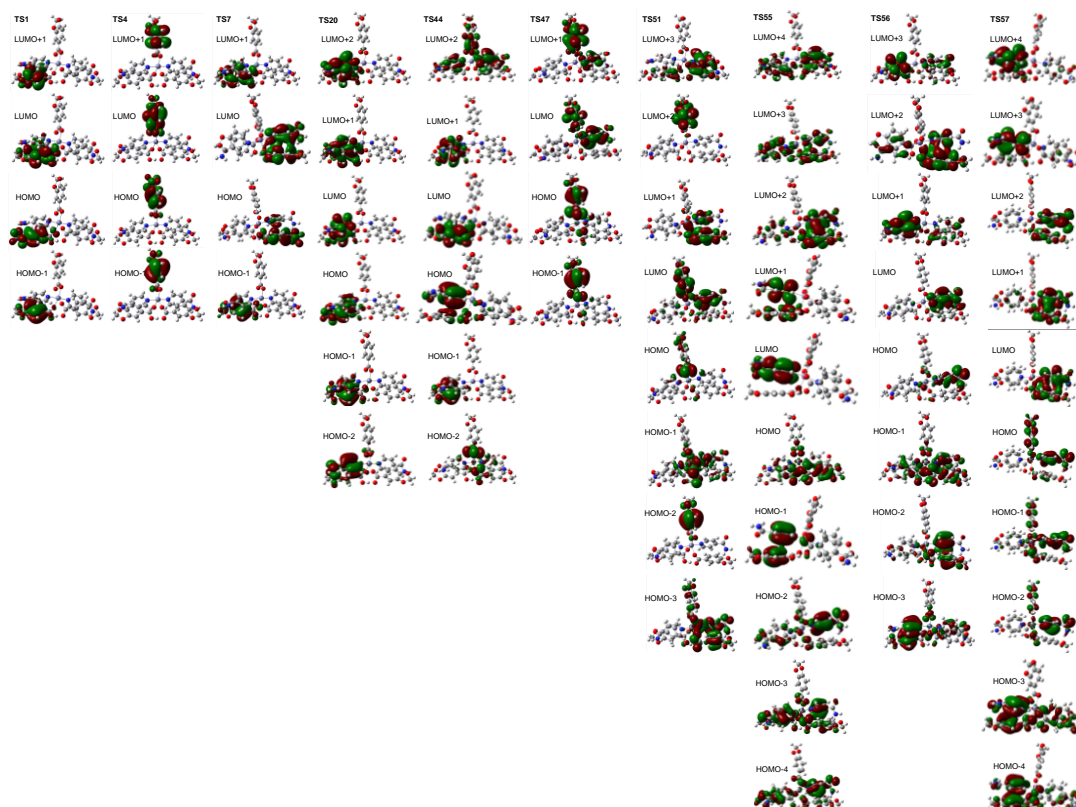

Figure S19. Molecular orbitals representation for the selected electronic transition states (TS) of the monomer in complex **2**. Oscillator strength values ( $f$ ): TS1, 0.2001; TS4, 0.2458; TS7, 0.1148; TS20, 0.1680; TS44, 0.3544; TS47, 0.4349; TS51, 0.2862; TS55, 0.5419; TS56, 0.5041; TS57, 0.3833.

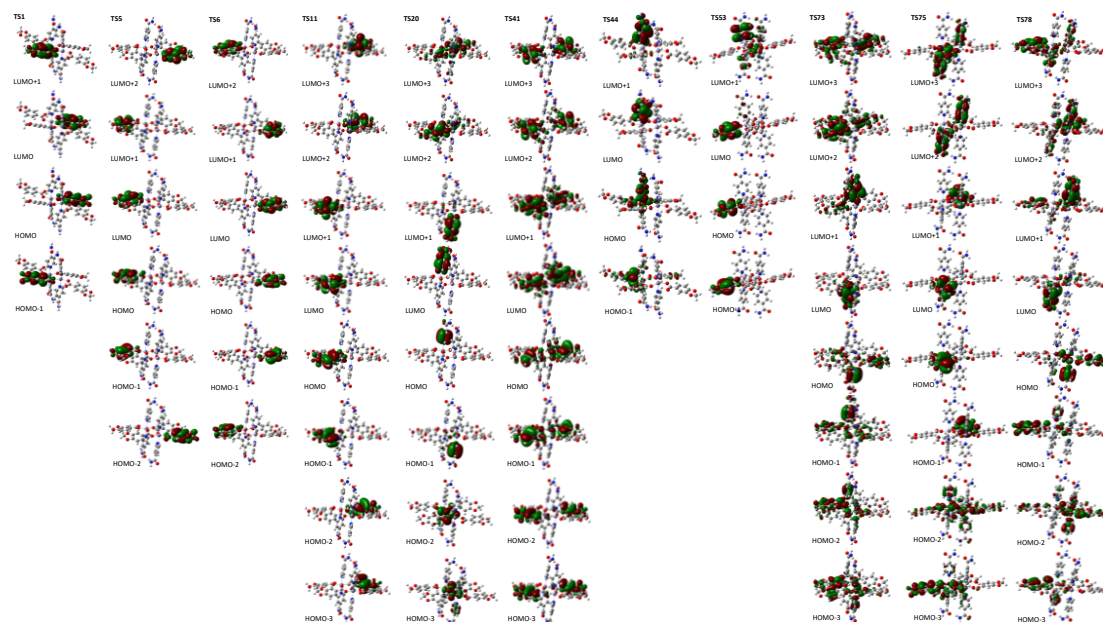

Figure S20. Molecular orbitals representation for the selected electronic transition states (TS) of the dimer in complex **2**. Oscillator strength values ( $f$ ): TS1, 0.4391; TS5, 0.3018; TS6, 0.0894; TS11, 0.0886; TS20, 0.1015; TS41, 0.8745; TS44, 0.1579; TS53, 0.2004; TS73, 0.3385; TS75, 0.4664; TS78, 0.4614.

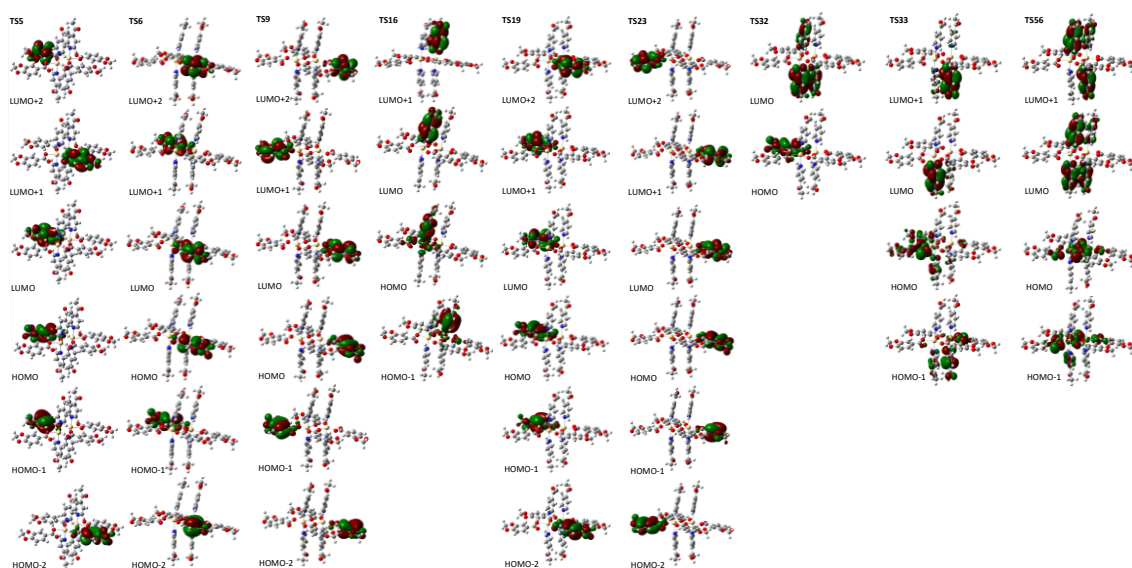

Figure S21. Molecular orbitals representation for the selected electronic transition states (TS) of complex **3**. Oscillator strength values ( $f$ ): TS5, 0.3176; TS6, 0.1106; TS9, 0.4499; TS16, 0.1119; TS19, 0.0951; TS23, 0.0647; TS32, 0.3452; TS33, 0.0680; TS56, 0.0301.

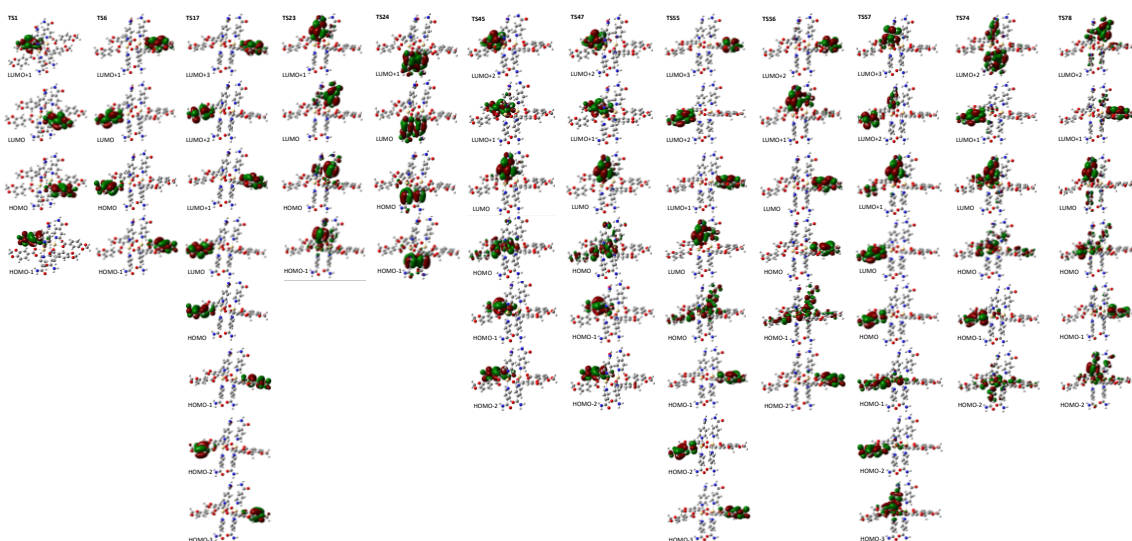

Figure S22. Molecular orbitals representation for the selected electronic transition states (TS) of complex **4**. Oscillator strength values ( $f$ ): TS1, 0.4340; TS6, 0.4243; TS17, 0.0972; TS23, 0.0743; TS24, 0.1117; TS45, 0.2965; TS47, 0.3544; TS55, 0.3980; TS56, 0.1695; TS57, 0.1686; TS74, 0.5762; TS78, 0.2031.

## NTOs representation

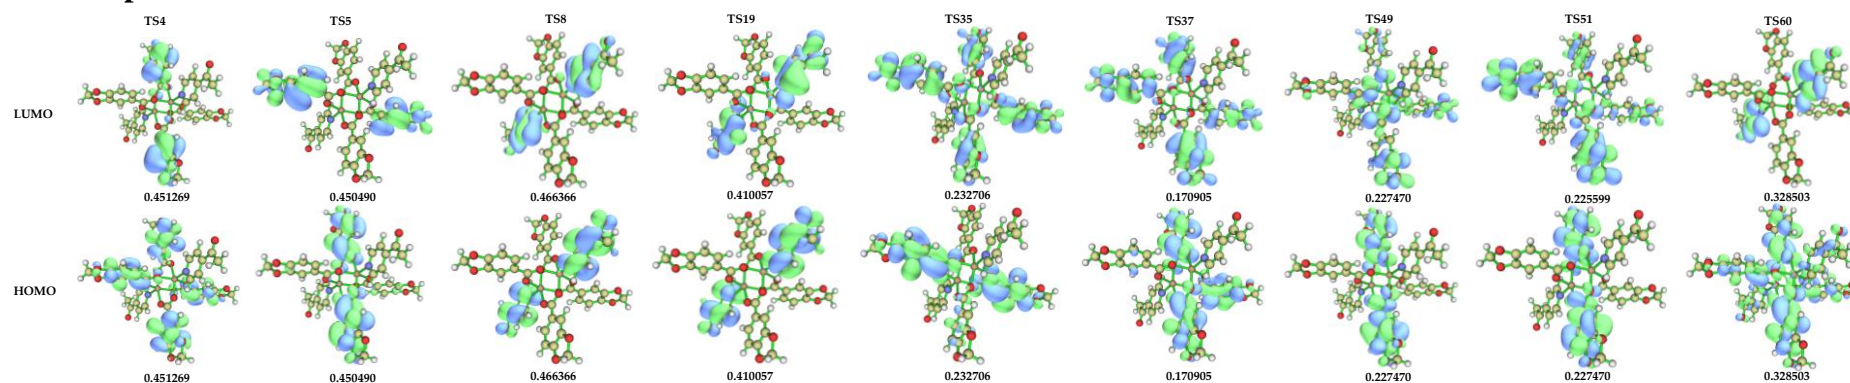

Figure S23. NTOs representation of selected electronic transition states in complex **1**.

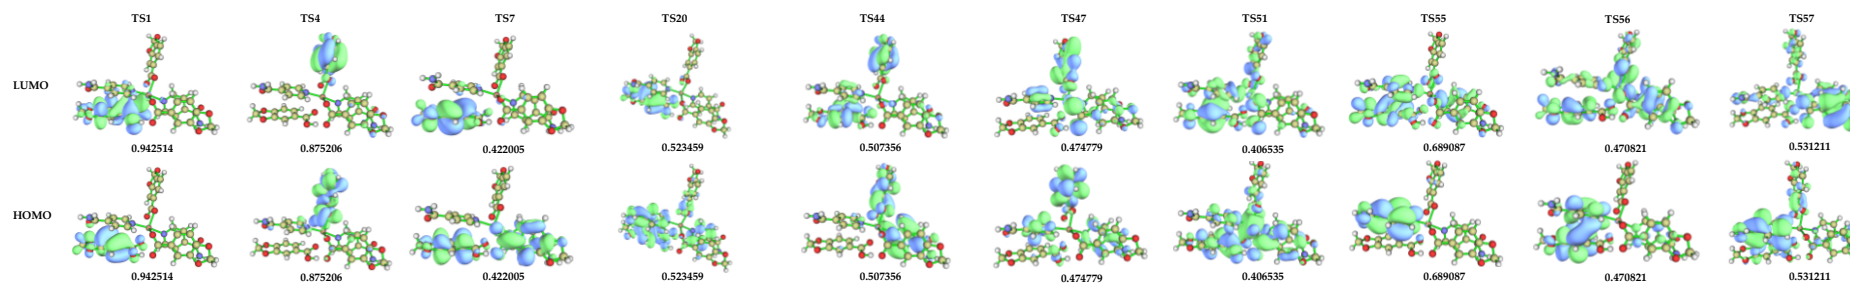

Figure S24. NTOs representation of selected electronic transition states in the monomer of complex **2**.



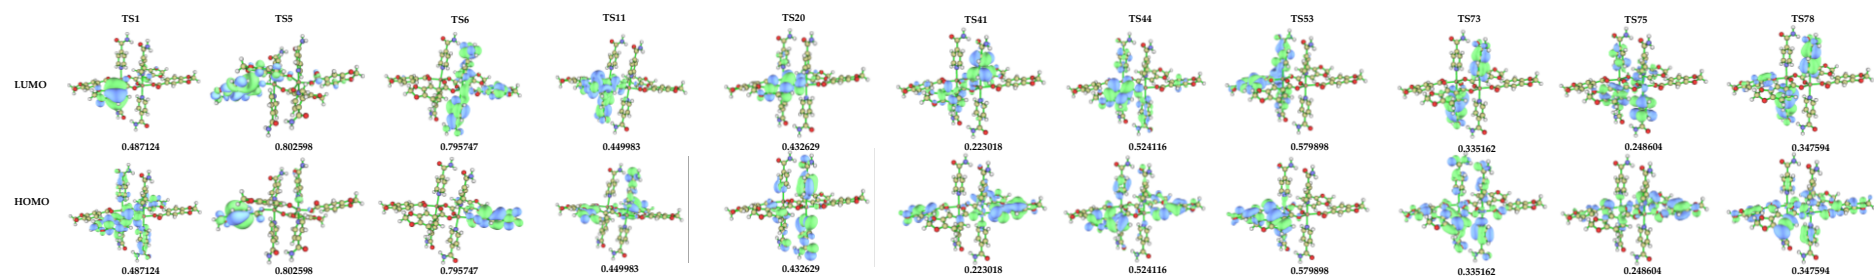

Figure S25. NTOs representation of selected electronic transition states in the dimer of complex **2**.

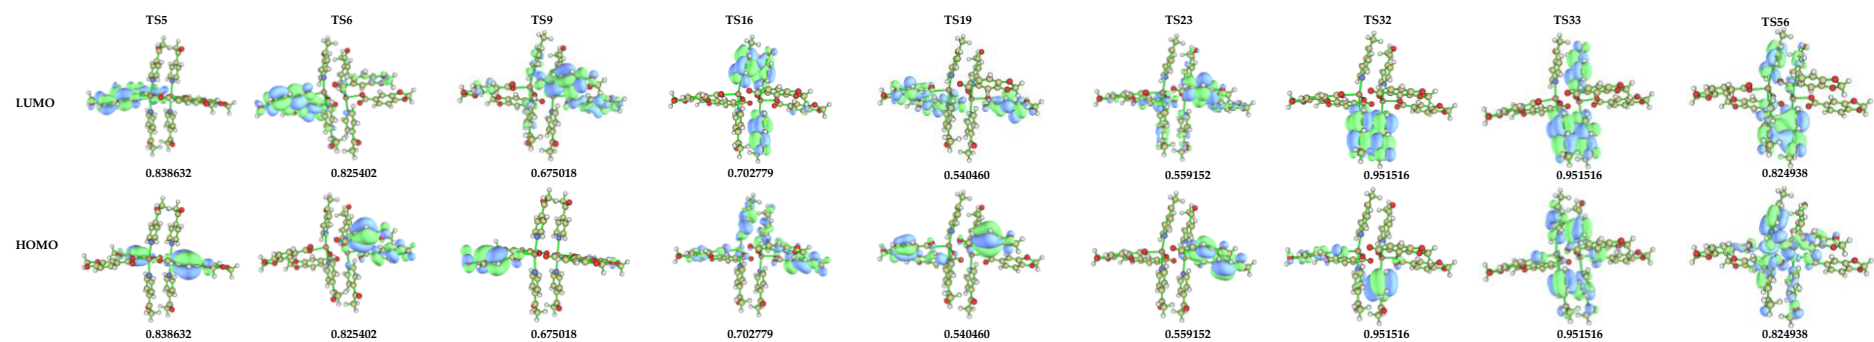

Figure S26. NTOs representation of selected electronic transition states in complex **3**.

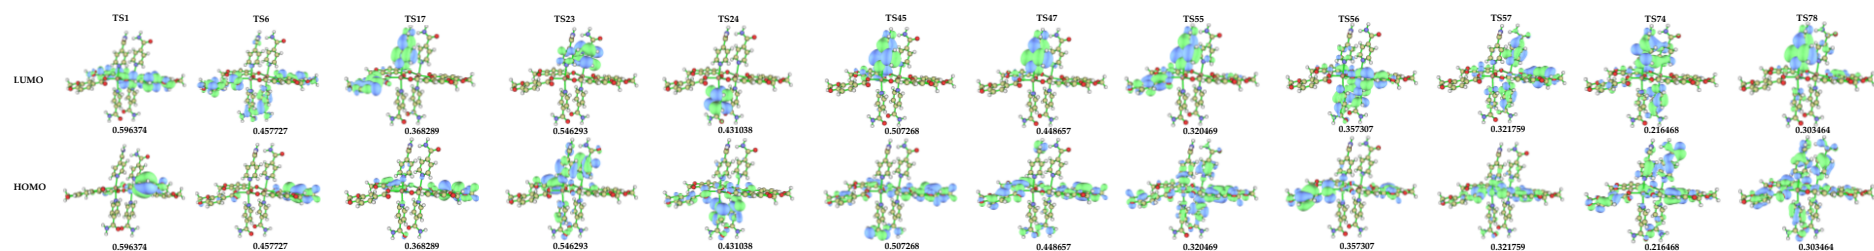

Figure S27. NTOs representation of selected electronic transition states in complex **4**.

## Geometry optimization

Table S3. Cartesian coordinates from X-ray and optimized geometry of **1** in MeOH.

| Symbol<br>(label) | X-Ray structure |            |            | Optimized geometry |            |            |
|-------------------|-----------------|------------|------------|--------------------|------------|------------|
|                   | X               | Y          | Z          | X                  | Y          | Z          |
| Zn (1)            | -0.4421000      | 3.6019000  | 6.4043000  | -1.1262760         | -0.2528500 | -0.9788810 |
| O (2)             | -1.3374000      | 6.1162000  | 4.6654000  | -0.3957940         | 1.3764020  | 1.7965940  |
| O (3)             | 0.4607000       | 5.2940000  | 5.7126000  | -2.0914290         | 1.0044050  | 0.3390910  |
| O (4)             | 3.8232000       | 9.1903000  | 5.1074000  | -5.8944370         | 3.9940300  | 2.2266930  |
| O (5)             | 2.7642000       | 10.8184000 | 3.8468000  | -5.0951760         | 4.9758030  | 4.2010300  |
| O (6)             | 0.1483000       | 2.6250000  | 4.7170000  | -1.4437810         | -1.7830510 | 0.3288820  |
| O (7)             | -1.6592000      | 3.4702000  | 3.7060000  | 0.2428180          | -1.4100690 | 1.7946380  |
| O (8)             | 2.6106000       | 0.4584000  | 0.7037000  | -3.7913160         | -5.9637010 | 2.3132660  |
| O (9)             | 1.3403000       | 0.9325000  | -1.1887000 | -2.6424910         | -6.5452040 | 4.2732810  |
| O (10)            | 3.6415000       | 0.5586000  | 11.1787000 | -5.2813320         | -1.8228510 | -6.3634550 |
| N (11)            | 0.9437000       | 2.9806000  | 7.7569000  | -2.5641560         | -0.5363930 | -2.3627590 |
| C (12)            | -0.1378000      | 6.1859000  | 5.0556000  | -1.5996550         | 1.5570200  | 1.3891890  |
| C (13)            | 0.6230000       | 7.4267000  | 4.6951000  | -2.4885350         | 2.4682320  | 2.1798370  |
| C (14)            | 1.9437000       | 7.5940000  | 5.1462000  | -3.8054670         | 2.7164240  | 1.7175490  |
| H (15)            | 2.3812000       | 6.9336000  | 5.6707000  | -4.1659190         | 2.2603390  | 0.8015440  |
| C (16)            | 2.5697000       | 8.7682000  | 4.7861000  | -4.5844240         | 3.5556350  | 2.4818580  |
| C (17)            | 3.9958000       | 10.4686000 | 4.4674000  | -6.3175430         | 4.7190890  | 3.4275390  |
| H (18)            | 4.2467000       | 11.1535000 | 5.1369000  | -6.7677910         | 5.6669050  | 3.1399730  |
| H (19)            | 4.7159000       | 10.4154000 | 3.7896000  | -6.9890960         | 4.0889890  | 4.0169650  |
| C (20)            | 1.9392000       | 9.7460000  | 4.0233000  | -4.1103400         | 4.1471640  | 3.6556310  |
| C (21)            | 0.6572000       | 9.5935000  | 3.5601000  | -2.8279770         | 3.9261840  | 4.1238800  |
| H (22)            | 0.2364000       | 10.2559000 | 3.0250000  | -2.4669620         | 4.3947330  | 5.0345840  |
| C (23)            | 0.0035000       | 8.4106000  | 3.9177000  | -2.0161700         | 3.0644100  | 3.3592920  |
| H (24)            | -0.8891000      | 8.2709000  | 3.6237000  | -1.0016490         | 2.8502910  | 3.6811510  |
| C (25)            | -0.5896000      | 2.8059000  | 3.7098000  | -0.7793930         | -2.0701260 | 1.3894480  |
| C (26)            | -0.1393000      | 2.2353000  | 2.3972000  | -1.2330350         | -3.2483580 | 2.1969140  |
| C (27)            | 1.0888000       | 1.5516000  | 2.3166000  | -2.3607490         | -3.9877540 | 1.7595040  |
| H (28)            | 1.6123000       | 1.3722000  | 3.0890000  | -2.8835850         | -3.7128540 | 0.8492750  |
| C (29)            | 1.4931000       | 1.1568000  | 1.0626000  | -2.7448110         | -5.0541700 | 2.5410870  |
| C (30)            | 2.6428000       | 0.4757000  | -0.7349000 | -3.8861020         | -6.7787620 | 3.5268250  |
| H (31)            | 2.8295000       | -0.4315000 | -1.0848000 | -3.9508850         | -7.8300810 | 3.2544480  |
| H (32)            | 3.3520000       | 1.0882000  | -1.0548000 | -4.7341780         | -6.4405730 | 4.1285620  |
| C (33)            | 0.7330000       | 1.4102000  | -0.0654000 | -2.0598800         | -5.4072710 | 3.7065830  |
| C (34)            | -0.4803000      | 2.0513000  | -0.0052000 | -0.9525930         | -4.7068070 | 4.1493790  |
| H (35)            | -1.0012000      | 2.2065000  | -0.7845000 | -0.4239060         | -4.9928220 | 5.0538420  |
| C (36)            | -0.9123000      | 2.4649000  | 1.2607000  | -0.5473260         | -3.6056910 | 3.3681640  |
| H (37)            | -1.7466000      | 2.9103000  | 1.3464000  | 0.3116660          | -3.0136630 | 3.6698050  |
| C (38)            | 0.7218000       | 1.8743000  | 8.4923000  | -2.3465410         | -1.3725380 | -3.4076240 |
| H (39)            | -0.0991000      | 1.4075000  | 8.3859000  | -1.3885840         | -1.8820830 | -3.4164980 |
| C (40)            | 1.6503000       | 1.3980000  | 9.3960000  | -3.2961840         | -1.5520070 | -4.4080520 |
| H (41)            | 1.4635000       | 0.6233000  | 9.9132000  | -3.1056160         | -2.2233280 | -5.2387240 |
| C (42)            | 2.8637000       | 2.0672000  | 9.5408000  | -4.5088430         | -0.8494690 | -4.3346470 |
| C (43)            | 3.0875000       | 3.1979000  | 8.7706000  | -4.7264900         | 0.0110750  | -3.2484540 |

|         |            |            |            |            |            |            |
|---------|------------|------------|------------|------------|------------|------------|
| H (44)  | 3.9050000  | 3.6758000  | 8.8444000  | -5.6450240 | 0.5782260  | -3.1411170 |
| C (45)  | 2.1074000  | 3.6212000  | 7.8948000  | -3.7316020 | 0.1425110  | -2.2803410 |
| H (46)  | 2.2670000  | 4.3973000  | 7.3706000  | -3.8453280 | 0.7941330  | -1.4200050 |
| C (47)  | 3.9055000  | 1.5157000  | 10.4695000 | -5.5322930 | -1.0437570 | -5.4291050 |
| C (48)  | 5.2462000  | 2.1630000  | 10.4681000 | -6.8306590 | -0.2870690 | -5.3621220 |
| H (49)  | 5.6255000  | 2.1271000  | 9.5658000  | -7.3784650 | -0.5301120 | -4.4420230 |
| H (50)  | 5.8373000  | 1.6911000  | 11.0909000 | -7.4467840 | -0.5498900 | -6.2258930 |
| H (51)  | 5.1570000  | 3.0985000  | 10.7482000 | -6.6516130 | 0.7963200  | -5.3649530 |
| Zn (52) | -2.7458000 | 4.6599000  | 4.9716000  | 1.1277240  | 0.2573510  | 0.9766940  |
| O (53)  | -1.8505000 | 2.1457000  | 6.7105000  | 0.3972700  | -1.3718050 | -1.7988740 |
| O (54)  | -3.6487000 | 2.9679000  | 5.6633000  | 2.0927850  | -1.0001570 | -0.3411410 |
| O (55)  | -7.0112000 | -0.9284000 | 6.2685000  | 5.8950550  | -3.9914570 | -2.2275650 |
| O (56)  | -5.9522000 | -2.5565000 | 7.5291000  | 5.0957350  | -4.9733970 | -4.2018080 |
| O (57)  | -3.3363000 | 5.6369000  | 6.6589000  | 1.4453830  | 1.7874360  | -0.3311070 |
| O (58)  | -1.5287000 | 4.7917000  | 7.6699000  | -0.2413870 | 1.4145920  | -1.7967050 |
| O (59)  | -5.7986000 | 7.8035000  | 10.6722000 | 3.7932500  | 5.9677050  | -2.3158930 |
| O (60)  | -4.5283000 | 7.3293000  | 12.5646000 | 2.6444520  | 6.5491210  | -4.2759610 |
| O (61)  | -6.8295000 | 7.7033000  | 0.1971000  | 5.2827350  | 1.8271820  | 6.3613830  |
| N (62)  | -4.1317000 | 5.2813000  | 3.6190000  | 2.5654970  | 0.5407280  | 2.3607260  |
| C (63)  | -3.0502000 | 2.0759000  | 6.3203000  | 1.6009970  | -1.5527770 | -1.3912280 |
| C (64)  | -3.8110000 | 0.8352000  | 6.6808000  | 2.4896890  | -2.4644480 | -2.1815640 |
| C (65)  | -5.1317000 | 0.6679000  | 6.2297000  | 3.8064630  | -2.7130020 | -1.7190230 |
| H (66)  | -5.5691000 | 1.3282000  | 5.7052000  | 4.1669400  | -2.2568380 | -0.8030670 |
| C (67)  | -5.7577000 | -0.5064000 | 6.5898000  | 4.5852340  | -3.5526660 | -2.4830250 |
| C (68)  | -7.1838000 | -2.2067000 | 6.9085000  | 6.3180530  | -4.7171050 | -3.4280930 |
| H (69)  | -7.4347000 | -2.8917000 | 6.2390000  | 6.7677170  | -5.6650810 | -3.1401330 |
| H (70)  | -7.9038000 | -2.1535000 | 7.5863000  | 6.9900900  | -4.0875520 | -4.0175450 |
| C (71)  | -5.1271000 | -1.4841000 | 7.3526000  | 4.1111160  | -4.1442900 | -3.6567360 |
| C (72)  | -3.8452000 | -1.3316000 | 7.8158000  | 2.8289050  | -3.9229490 | -4.1252320 |
| H (73)  | -3.4244000 | -1.9940000 | 8.3509000  | 2.4678630  | -4.3915710 | -5.0358880 |
| C (74)  | -3.1915000 | -0.1487000 | 7.4581000  | 2.0172900  | -3.0607160 | -3.3609590 |
| H (75)  | -2.2989000 | -0.0090000 | 7.7522000  | 1.0028920  | -2.8463090 | -3.6830140 |
| C (76)  | -2.5983000 | 5.4560000  | 7.6661000  | 0.7809610  | 2.0745230  | -1.3916510 |
| C (77)  | -3.0487000 | 6.0266000  | 8.9787000  | 1.2347080  | 3.2526290  | -2.1992340 |
| C (78)  | -4.2767000 | 6.7103000  | 9.0593000  | 2.3625000  | 3.9919590  | -1.7619150 |
| H (79)  | -4.8002000 | 6.8896000  | 8.2869000  | 2.8853390  | 3.7170890  | -0.8516780 |
| C (80)  | -4.6811000 | 7.1051000  | 10.3133000 | 2.7466480  | 5.0582660  | -2.5436050 |
| C (81)  | -5.8308000 | 7.7862000  | 12.1108000 | 3.8880330  | 6.7827420  | -3.5294710 |
| H (82)  | -6.0175000 | 8.6933000  | 12.4607000 | 3.9527650  | 7.8340720  | -3.2571150 |
| H (83)  | -6.5400000 | 7.1736000  | 12.4307000 | 4.7361410  | 6.4445800  | -4.1311760 |
| C (84)  | -3.9210000 | 6.8517000  | 11.4413000 | 2.0617360  | 5.4113120  | -3.7091290 |
| C (85)  | -2.7077000 | 6.2106000  | 11.3811000 | 0.9543760  | 4.7109090  | -4.1518410 |
| H (86)  | -2.1868000 | 6.0554000  | 12.1604000 | 0.4257090  | 4.9968820  | -5.0563280 |
| C (87)  | -2.2757000 | 5.7970000  | 10.1152000 | 0.5490110  | 3.6099130  | -3.3705060 |
| H (88)  | -1.4413000 | 5.3516000  | 10.0295000 | -0.3100550 | 3.0179460  | -3.6720540 |
| C (89)  | -3.9097000 | 6.3876000  | 2.8836000  | 2.3482680  | 1.3775570  | 3.4051210  |
| H (90)  | -3.0889000 | 6.8543000  | 2.9900000  | 1.3906580  | 1.8877600  | 3.4135630  |
| C (91)  | -4.8382000 | 6.8638000  | 1.9799000  | 3.2978430  | 1.5568720  | 4.4056400  |
| H (92)  | -4.6515000 | 7.6386000  | 1.4627000  | 3.1075910  | 2.2287560  | 5.2359290  |

|         |            |           |           |           |            |           |
|---------|------------|-----------|-----------|-----------|------------|-----------|
| C (93)  | -6.0517000 | 6.1947000 | 1.8350000 | 4.5100230 | 0.8534420  | 4.3328310 |
| C (94)  | -6.2755000 | 5.0640000 | 2.6053000 | 4.7272670 | -0.0078230 | 3.2471310 |
| H (95)  | -7.0930000 | 4.5860000 | 2.5315000 | 5.6454170 | -0.5756840 | 3.1402640 |
| C (96)  | -5.2953000 | 4.6407000 | 3.4811000 | 3.7324740 | -0.1390510 | 2.2788890 |
| H (97)  | -5.4549000 | 3.8646000 | 4.0053000 | 3.8459240 | -0.7911820 | 1.4189020 |
| C (98)  | -7.0935000 | 6.7462000 | 0.9064000 | 5.5334130 | 1.0475970  | 5.4273680 |
| C (99)  | -8.4342000 | 6.0988000 | 0.9078000 | 6.8313820 | 0.2901820  | 5.3608620 |
| H (100) | -8.8135000 | 6.1347000 | 1.8101000 | 7.3794270 | 0.5325490  | 4.4407240 |
| H (101) | -9.0253000 | 6.5708000 | 0.2850000 | 7.4475430 | 0.5530360  | 6.2245970 |
| H (102) | -8.3450000 | 5.1634000 | 0.6277000 | 6.6517600 | -0.7931100 | 5.3641290 |

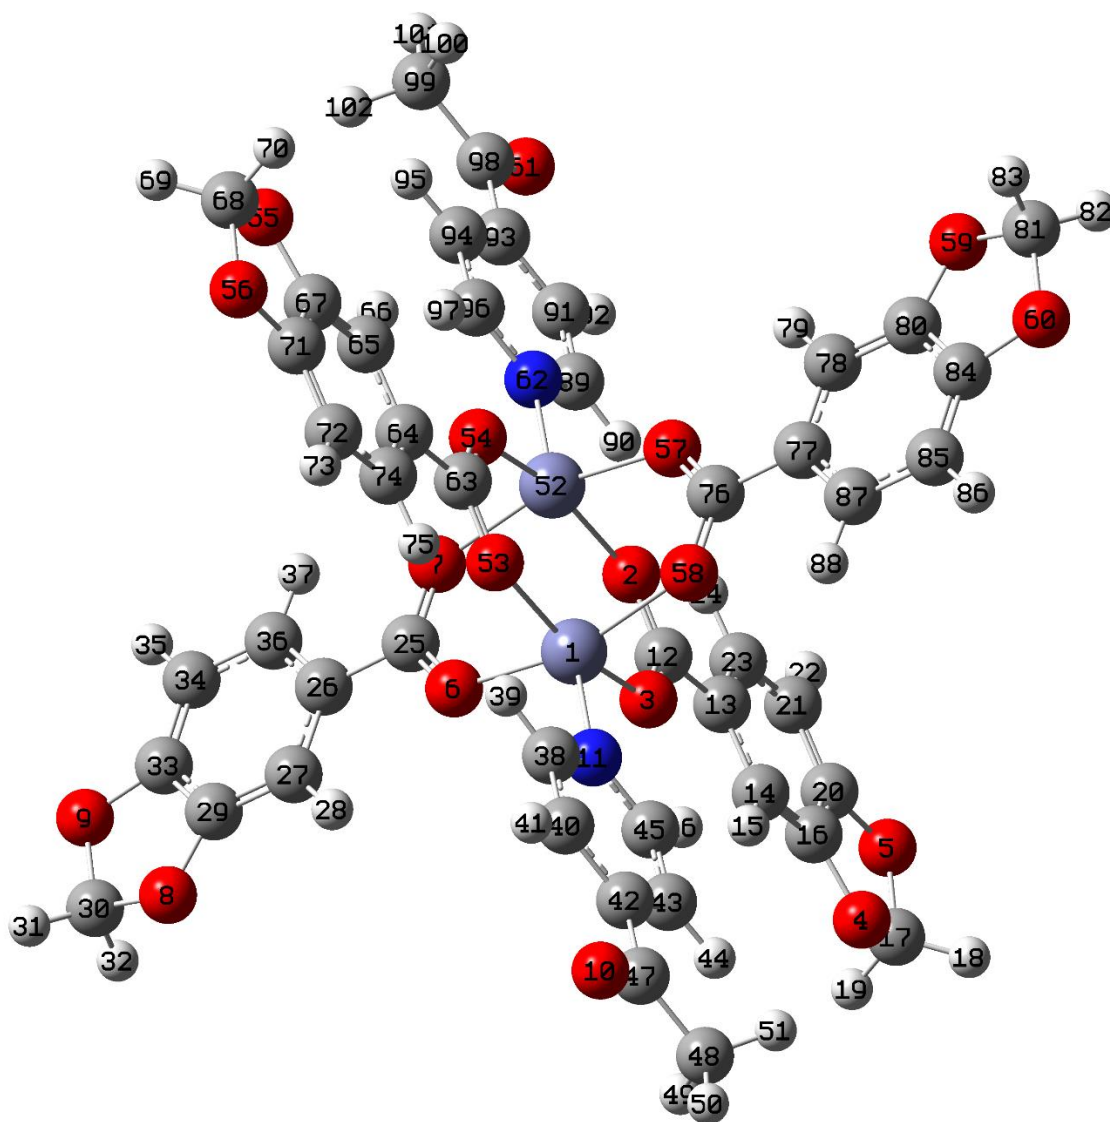

Figure S28. Optimized geometry of **1** in MeOH solution with labelling scheme.

Table S4. Cartesian coordinates from X-ray and optimized geometry of the monomer present in **2** in MeOH.

| Symbol<br>(label) | X-Ray structure |   |   | Optimized geometry |   |   |
|-------------------|-----------------|---|---|--------------------|---|---|
|                   | X               | Y | Z | X                  | Y | Z |

|        |            |            |            |            |            |            |
|--------|------------|------------|------------|------------|------------|------------|
| Zn (1) | 7.7312000  | 14.6545000 | 6.9711000  | 0.0771250  | 0.0147330  | 0.2007710  |
| O (2)  | 7.5770000  | 14.7442000 | 8.9646000  | 0.8089610  | -1.4228870 | 1.5087800  |
| O (3)  | 5.3506000  | 14.8097000 | 9.2492000  | 1.1755130  | -3.4292830 | 0.5352630  |
| O (4)  | 7.1084000  | 14.1041000 | 15.2042000 | 7.1627870  | -1.7507440 | 1.5848470  |
| O (5)  | 5.0107000  | 14.6628000 | 14.3928000 | 6.3631440  | -3.3364500 | 0.0582120  |
| O (6)  | 6.0632000  | 15.1296000 | 5.8745000  | -0.6355060 | -1.4244810 | -1.2753070 |
| O (7)  | 4.3840000  | 15.8267000 | 7.1760000  | -1.1149780 | -3.4299050 | -0.3509050 |
| H (8)  | 4.9170000  | 15.6168000 | 7.7903000  | -0.1060100 | -3.4244900 | 0.0473110  |
| O (9)  | 1.8336000  | 16.9276000 | 1.6169000  | -6.9212380 | -1.8970890 | -2.2036380 |
| O (10) | 0.8134000  | 17.0454000 | 3.6959000  | -6.2844960 | -3.5865830 | -0.7056090 |
| O (11) | 9.8183000  | 14.0147000 | 7.0509000  | 0.4649020  | 1.8779360  | 1.1852070  |
| O (12) | 8.9059000  | 14.2925000 | 5.0783000  | -0.5208410 | 2.0219500  | -0.8086450 |
| O (13) | 14.6787000 | 12.6672000 | 3.1789000  | -0.2522600 | 8.2172360  | 0.5271250  |
| O (14) | 12.8615000 | 13.2838000 | 1.8686000  | -1.1200400 | 7.2000810  | -1.3999940 |
| O (15) | 9.3681000  | 21.4222000 | 5.5431000  | -6.8274910 | -0.8325250 | 1.1038290  |
| O (16) | 7.2790000  | 7.6443000  | 7.4536000  | 6.5283210  | 0.8290500  | -2.6310900 |
| N (17) | 8.3251000  | 16.7075000 | 6.8610000  | -1.8620630 | -0.1548320 | 0.9752720  |
| N (18) | 10.3983000 | 21.3079000 | 7.5475000  | -6.2534030 | -1.3802630 | 3.2478820  |
| H (19) | 10.6843000 | 22.1383000 | 7.4916000  | -7.2100730 | -1.6096190 | 3.4757670  |
| H (20) | 10.5924000 | 20.8224000 | 8.2553000  | -5.5736720 | -1.4053080 | 3.9918960  |
| N (21) | 7.1049000  | 12.5938000 | 6.9264000  | 1.9329960  | 0.0149890  | -0.7722820 |
| N (22) | 5.9090000  | 7.7904000  | 5.6793000  | 6.5647350  | -1.4337290 | -2.2784740 |
| H (23) | 5.8611000  | 6.9151000  | 5.6007000  | 7.5009420  | -1.4993360 | -2.6529430 |
| H (24) | 5.4690000  | 8.3071000  | 5.1190000  | 6.1873060  | -2.2519730 | -1.8152580 |
| C (25) | 6.5380000  | 14.7009000 | 9.6786000  | 1.5924740  | -2.3811240 | 1.1505520  |
| C (26) | 6.7285000  | 14.5169000 | 11.1465000 | 3.0585450  | -2.2431960 | 1.3899030  |
| C (27) | 7.9877000  | 14.1798000 | 11.6341000 | 3.5421370  | -1.2747120 | 2.2839870  |
| H (28) | 8.7070000  | 14.0701000 | 11.0229000 | 2.8273530  | -0.6741290 | 2.8391390  |
| C (29) | 8.2245000  | 13.9999000 | 13.0066000 | 4.9229320  | -1.0551860 | 2.4524840  |
| H (30) | 9.0787000  | 13.7569000 | 13.3435000 | 5.3040860  | -0.3030440 | 3.1362810  |
| C (31) | 7.1419000  | 14.1946000 | 13.8300000 | 5.7704820  | -1.8259470 | 1.6766250  |
| C (32) | 5.7614000  | 14.3513000 | 15.5639000 | 7.5752360  | -2.8884750 | 0.7541730  |
| H (33) | 5.7161000  | 15.1059000 | 16.2019000 | 7.9414510  | -3.6920500 | 1.3980110  |
| H (34) | 5.3793000  | 13.5499000 | 16.0031000 | 8.3087040  | -2.5559050 | 0.0234570  |
| C (35) | 5.8921000  | 14.5274000 | 13.3527000 | 5.2887710  | -2.7875230 | 0.7865650  |
| C (36) | 5.6415000  | 14.6881000 | 12.0160000 | 3.9467880  | -3.0334760 | 0.6202880  |
| H (37) | 4.7736000  | 14.9030000 | 11.6949000 | 3.5718170  | -3.7656310 | -0.0873170 |
| C (38) | 4.9487000  | 15.6250000 | 6.0251000  | -1.4596380 | -2.3572700 | -1.0284780 |
| C (39) | 4.1482000  | 16.0154000 | 4.8470000  | -2.8798140 | -2.2591860 | -1.4281390 |
| C (40) | 4.7585000  | 15.9532000 | 3.5973000  | -3.2690930 | -1.2512930 | -2.3256430 |
| H (41) | 5.6717000  | 15.6962000 | 3.5387000  | -2.5060630 | -0.6043110 | -2.7490930 |
| C (42) | 4.0576000  | 16.2585000 | 2.4329000  | -4.6208650 | -1.0554420 | -2.6627420 |
| H (43) | 4.4675000  | 16.2231000 | 1.5762000  | -4.9309690 | -0.2824580 | -3.3590280 |
| C (44) | 2.7387000  | 16.6142000 | 2.5948000  | -5.5400020 | -1.8843300 | -2.0439390 |
| C (45) | 0.6247000  | 17.2524000 | 2.2948000  | -7.4471910 | -2.8413690 | -1.2031750 |
| H (46) | -0.1110000 | 16.6782000 | 1.9654000  | -8.1352930 | -3.5296820 | -1.6898660 |
| H (47) | 0.3842000  | 18.1968000 | 2.1229000  | -7.8852930 | -2.2748050 | -0.3809150 |
| C (48) | 2.1254000  | 16.6937000 | 3.8292000  | -5.1548020 | -2.8892060 | -1.1499190 |
| C (49) | 2.8017000  | 16.4050000 | 4.9936000  | -3.8378710 | -3.1175930 | -0.8277840 |



|        |            |            |           |            |            |            |
|--------|------------|------------|-----------|------------|------------|------------|
| H (50) | 2.3847000  | 16.4652000 | 5.8449000 | -3.5375700 | -3.8945910 | -0.1326300 |
| C (51) | 9.9162000  | 14.0168000 | 5.7864000 | -0.0440520 | 2.6005230  | 0.2362960  |
| C (52) | 11.2122000 | 13.6671000 | 5.1505000 | -0.0680730 | 4.0835990  | 0.3619010  |
| C (53) | 12.3155000 | 13.3094000 | 5.9211000 | 0.4451470  | 4.6999930  | 1.5141680  |
| H (54) | 12.2324000 | 13.3066000 | 6.8672000 | 0.8555650  | 4.0738570  | 2.3008580  |
| C (55) | 13.5349000 | 12.9549000 | 5.3499000 | 0.4354660  | 6.1011600  | 1.6629930  |
| H (56) | 14.2822000 | 12.7070000 | 5.8825000 | 0.8250780  | 6.5854310  | 2.5534180  |
| C (57) | 13.6030000 | 12.9809000 | 3.9758000 | -0.0968470 | 6.8316410  | 0.6161940  |
| C (58) | 14.2492000 | 12.8267000 | 1.8276000 | -0.7040340 | 8.4904140  | -0.8441610 |
| H (59) | 14.3122000 | 11.9657000 | 1.3428000 | 0.1334560  | 8.8855720  | -1.4252050 |
| H (60) | 14.8159000 | 13.4920000 | 1.3628000 | -1.5569310 | 9.1652970  | -0.8146970 |
| C (61) | 12.5280000 | 13.3534000 | 3.2052000 | -0.6083060 | 6.2215050  | -0.5325320 |
| C (62) | 11.3164000 | 13.7092000 | 3.7422000 | -0.6155240 | 4.8545070  | -0.6948530 |
| H (63) | 10.5857000 | 13.9706000 | 3.1945000 | -1.0179790 | 4.3742830  | -1.5811580 |
| C (64) | 8.8876000  | 17.3024000 | 7.9021000 | -2.1452470 | -1.0905670 | 1.9141720  |
| H (65) | 8.9767000  | 16.8085000 | 8.7097000 | -1.2917480 | -1.6240660 | 2.3177510  |
| C (66) | 9.3535000  | 18.6092000 | 7.8749000 | -3.4534250 | -1.3777640 | 2.3009420  |
| H (67) | 9.7562000  | 18.9934000 | 8.6451000 | -3.6279620 | -2.1671190 | 3.0263810  |
| C (68) | 9.2234000  | 19.3521000 | 6.6985000 | -4.5081720 | -0.6764020 | 1.6999700  |
| C (69) | 8.6094000  | 18.7380000 | 5.6210000 | -4.2107790 | 0.3040980  | 0.7465050  |
| H (70) | 8.4806000  | 19.2133000 | 4.8085000 | -5.0076700 | 0.8520270  | 0.2547040  |
| C (71) | 8.1872000  | 17.4287000 | 5.7404000 | -2.8808090 | 0.5421650  | 0.4123730  |
| H (72) | 7.7772000  | 17.0174000 | 4.9879000 | -2.5954700 | 1.2795820  | -0.3299420 |
| C (73) | 9.6665000  | 20.7823000 | 6.5553000 | -5.9557610 | -0.9709740 | 1.9982300  |
| C (74) | 7.5115000  | 11.7603000 | 7.8919000 | 2.9011930  | 0.8397670  | -0.2988520 |
| H (75) | 7.9382000  | 12.1290000 | 8.6558000 | 2.5924810  | 1.5421230  | 0.4678090  |
| C (76) | 7.3424000  | 10.3921000 | 7.8340000 | 4.2140790  | 0.7803280  | -0.7557460 |
| H (77) | 7.6531000  | 9.8399000  | 8.5413000 | 4.9607000  | 1.4622660  | -0.3612320 |
| C (78) | 6.7122000  | 9.8310000  | 6.7309000 | 4.5548610  | -0.1787350 | -1.7173750 |
| C (79) | 6.2280000  | 10.6958000 | 5.7608000 | 3.5555240  | -1.0280600 | -2.2109200 |
| H (80) | 5.7483000  | 10.3560000 | 5.0147000 | 3.7742410  | -1.7772240 | -2.9662730 |
| C (81) | 6.4466000  | 12.0552000 | 5.8887000 | 2.2549130  | -0.8938010 | -1.7247090 |
| H (82) | 6.1159000  | 12.6341000 | 5.2117000 | 1.4421970  | -1.5229120 | -2.0691890 |
| C (83) | 6.6384000  | 8.3265000  | 6.6354000 | 5.9673400  | -0.2242990 | -2.2414460 |

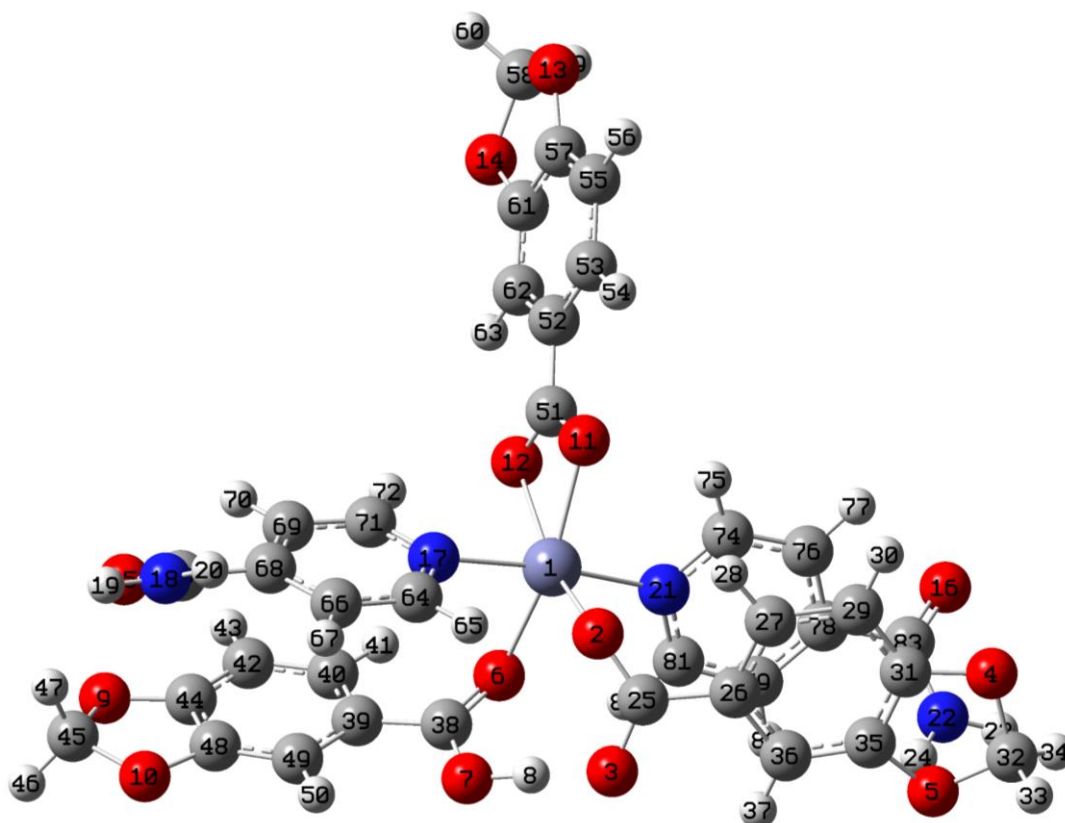

Figure S29. Optimized geometry of the monomer present in **2** in MeOH solution with labelling scheme.

Table S5. Cartesian coordinates from X-ray and optimized geometry of the dimer present in **2** in MeOH.

| Symbol<br>(label) | X-Ray structure |            |            | Optimized geometry |            |            |
|-------------------|-----------------|------------|------------|--------------------|------------|------------|
|                   | X               | Y          | Z          | X                  | Y          | Z          |
| Zn (1)            | 5.8999000       | 8.7748000  | 1.3491000  | -1.7428240         | 0.8767620  | -0.6238630 |
| O (2)             | 3.8696000       | 9.4500000  | 1.3978000  | -3.7121540         | 1.0392820  | -0.2826040 |
| O (3)             | 4.7969000       | 8.9633000  | 3.3254000  | -4.1652680         | 1.4683370  | -2.4560800 |
| O (4)             | -0.9940000      | 10.4907000 | 5.2749000  | -10.0811050        | 0.5966630  | -0.3471640 |
| O (5)             | 0.8089000       | 9.7952000  | 6.5519000  | -9.4077170         | 1.3384270  | -2.4673060 |
| O (6)             | 7.5185000       | 8.2741000  | 2.4588000  | -0.3212580         | 1.0714470  | -2.1478250 |
| O (7)             | 8.7071000       | 7.7003000  | 0.6833000  | 1.0622330          | -0.3700760 | -1.1169280 |
| O (8)             | 12.7421000      | 6.0932000  | 5.1774000  | 5.2003000          | 1.8896340  | -5.2816250 |
| O (9)             | 13.1119000      | 6.1280000  | 2.8830000  | 5.5582740          | 0.2945640  | -3.5983730 |
| O (10)            | 4.9094000       | 1.8324000  | 2.2303000  | -1.3383370         | 7.9393470  | -0.6290500 |
| O (11)            | 7.3329000       | 15.6388000 | 0.5121000  | -2.5681080         | -6.0695610 | -1.9722010 |
| N (12)            | 5.3287000       | 6.6997000  | 1.3068000  | -1.3944150         | 2.9244160  | -0.3339250 |
| N (13)            | 3.7604000       | 1.9456000  | 0.3001000  | 0.5327560          | 7.5215760  | 0.6236170  |
| H (14)            | 3.6123000       | 1.0783000  | 0.2840000  | 0.7157380          | 8.5124810  | 0.6962280  |
| H (15)            | 3.4505000       | 2.4567000  | -0.3459000 | 1.2190540          | 6.8853020  | 1.0327220  |
| N (16)            | 6.5852000       | 10.8130000 | 1.3726000  | -2.0929800         | -1.1098800 | -1.3035980 |

|        |            |            |            |             |            |            |
|--------|------------|------------|------------|-------------|------------|------------|
| N (17) | 8.2603000  | 15.4979000 | 2.5572000  | -3.5559260  | -5.2422890 | -3.8545500 |
| H (18) | 8.4639000  | 16.3541000 | 2.5671000  | -3.7304400  | -6.1733610 | -4.2058020 |
| H (19) | 8.4658000  | 14.9890000 | 3.2450000  | -3.9171020  | -4.4627960 | -4.3832110 |
| C (20) | 3.7885000  | 9.3295000  | 2.6528000  | -4.5392990  | 1.1955450  | -1.2765050 |
| C (21) | 2.4998000  | 9.6262000  | 3.3331000  | -6.0013970  | 1.0173200  | -0.9691200 |
| C (22) | 1.4065000  | 10.0202000 | 2.5607000  | -6.4136450  | 0.5787520  | 0.2988850  |
| H (23) | 1.5086000  | 10.0705000 | 1.6183000  | -5.6640230  | 0.3767780  | 1.0568700  |
| C (24) | 0.1608000  | 10.3461000 | 3.1234000  | -7.7768280  | 0.3940990  | 0.6078960  |
| H (25) | -0.5810000 | 10.6197000 | 2.5982000  | -8.0971540  | 0.0592030  | 1.5902650  |
| C (26) | 0.1003000  | 10.2430000 | 4.4549000  | -8.6832750  | 0.6622610  | -0.4012800 |
| C (27) | -0.5509000 | 10.2917000 | 6.5826000  | -10.5479270 | 0.7961630  | -1.7248530 |
| H (28) | -1.1366000 | 9.6396000  | 7.0420000  | -11.3613120 | 1.5187910  | -1.7290200 |
| H (29) | -0.5853000 | 11.1462000 | 7.0834000  | -10.8341460 | -0.1699280 | -2.1504200 |
| C (30) | 1.1505000  | 9.8370000  | 5.2459000  | -8.2779770  | 1.0992480  | -1.6646940 |
| C (31) | 2.4013000  | 9.5217000  | 4.7208000  | -6.9517750  | 1.2909800  | -1.9842680 |
| H (32) | 3.1327000  | 9.2569000  | 5.2653000  | -6.6303720  | 1.6342190  | -2.9628920 |
| C (33) | 8.5407000  | 7.7773000  | 1.9197000  | 0.8247340   | 0.5132540  | -2.0176890 |
| C (34) | 9.6142000  | 7.2723000  | 2.8233000  | 1.9369020   | 0.8936390  | -2.9405810 |
| C (35) | 9.3941000  | 7.2109000  | 4.1872000  | 1.7301200   | 1.8513430  | -3.9452490 |
| H (36) | 8.5402000  | 7.4483000  | 4.5300000  | 0.7429590   | 2.2916830  | -4.0524790 |
| C (37) | 10.4034000 | 6.8062000  | 5.0806000  | 2.7755790   | 2.2496820  | -4.8022450 |
| H (38) | 10.2572000 | 6.7585000  | 6.0174000  | 2.6280060   | 2.9944620  | -5.5784780 |
| C (39) | 11.5991000 | 6.4853000  | 4.5179000  | 4.0051790   | 1.6478890  | -4.6016900 |
| C (40) | 13.7284000 | 5.8958000  | 4.1582000  | 6.1659490   | 0.8970410  | -4.7882220 |
| H (41) | 14.0794000 | 4.9704000  | 4.2006000  | 7.0890940   | 1.4008610  | -4.5084150 |
| H (42) | 14.4828000 | 6.5222000  | 4.2892000  | 6.3128440   | 0.1293670  | -5.5518800 |
| C (43) | 11.8271000 | 6.5186000  | 3.1540000  | 4.2125700   | 0.6952890  | -3.6002200 |
| C (44) | 10.8476000 | 6.9048000  | 2.2556000  | 3.2092560   | 0.2928430  | -2.7496220 |
| H (45) | 10.9995000 | 6.9215000  | 1.3179000  | 3.3740330   | -0.4252500 | -1.9489700 |
| C (46) | 5.7329000  | 5.8794000  | 2.2863000  | -1.7611200  | 3.7767970  | -1.3218030 |
| H (47) | 6.2392000  | 6.2411000  | 3.0039000  | -2.2780250  | 3.3349790  | -2.1686610 |
| C (48) | 5.4423000  | 4.5270000  | 2.2965000  | -1.4978730  | 5.1415080  | -1.2493360 |
| H (49) | 5.7468000  | 3.9804000  | 3.0115000  | -1.8064440  | 5.8084770  | -2.0477370 |
| C (50) | 4.7069000  | 3.9718000  | 1.2616000  | -0.8305730  | 5.6481440  | -0.1249110 |
| C (51) | 4.2663000  | 4.8331000  | 0.2626000  | -0.4741960  | 4.7659250  | 0.9035900  |
| H (52) | 3.7388000  | 4.5018000  | -0.4556000 | 0.0164830   | 5.1164240  | 1.8065260  |
| C (53) | 4.6021000  | 6.1782000  | 0.3205000  | -0.7730900  | 3.4100720  | 0.7627620  |
| H (54) | 4.3003000  | 6.7533000  | -0.3726000 | -0.5211180  | 2.6784220  | 1.5242650  |
| C (55) | 4.4539000  | 2.4857000  | 1.3042000  | -0.5597200  | 7.1312740  | -0.0576280 |
| C (56) | 7.3020000  | 11.2856000 | 2.3988000  | -1.9119890  | -1.4261220 | -2.6055260 |
| H (57) | 7.5580000  | 10.6821000 | 3.0854000  | -1.5302980  | -0.6348700 | -3.2401150 |
| C (58) | 7.6906000  | 12.6206000 | 2.5079000  | -2.1897160  | -2.6985110 | -3.1056660 |
| H (59) | 8.2047000  | 12.9194000 | 3.2498000  | -2.0180710  | -2.9097690 | -4.1570880 |
| C (60) | 7.3063000  | 13.5017000 | 1.5071000  | -2.6547490  | -3.6821440 | -2.2233270 |
| C (61) | 6.5794000  | 13.0136000 | 0.4330000  | -2.8314440  | -3.3570910 | -0.8721270 |
| H (62) | 6.3145000  | 13.5920000 | -0.2725000 | -3.1750100  | -4.1018620 | -0.1614140 |
| C (63) | 6.2445000  | 11.6734000 | 0.4006000  | -2.5568080  | -2.0572090 | -0.4551740 |
| H (64) | 5.7500000  | 11.3456000 | -0.3422000 | -2.7122530  | -1.7546900 | 0.5740960  |
| C (65) | 7.6441000  | 14.9737000 | 1.5037000  | -2.9260350  | -5.0895230 | -2.6786570 |

|         |            |            |            |            |            |            |
|---------|------------|------------|------------|------------|------------|------------|
| Zn (66) | 8.6601000  | 7.7669000  | -1.3491000 | 1.7356130  | -0.8343720 | 0.6971640  |
| O (67)  | 10.6904000 | 7.0916000  | -1.3978000 | 3.7003510  | -1.0251190 | 0.3749840  |
| O (68)  | 9.7631000  | 7.5784000  | -3.3254000 | 4.2770010  | -1.5086560 | 2.5121350  |
| O (69)  | 15.5540000 | 6.0510000  | -5.2749000 | 10.0689020 | -0.7848200 | 0.0368740  |
| O (70)  | 13.7511000 | 6.7465000  | -6.5519000 | 9.5091250  | -1.5730360 | 2.1731780  |
| O (71)  | 7.0415000  | 8.2676000  | -2.4588000 | 0.3275300  | -1.0156890 | 2.2358190  |
| O (72)  | 5.8530000  | 8.8413000  | -0.6833000 | -1.0536260 | 0.4112320  | 1.1842130  |
| O (73)  | 1.8179000  | 10.4485000 | -5.1774000 | -5.2268290 | -1.8850060 | 5.2976660  |
| O (74)  | 1.4481000  | 10.4136000 | -2.8830000 | -5.5851940 | -0.3170780 | 3.5888810  |
| O (75)  | 9.6506000  | 14.7093000 | -2.2303000 | 1.2887940  | -7.8945910 | 0.7052680  |
| O (76)  | 7.2271000  | 0.9028000  | -0.5121000 | 2.5837500  | 6.1227290  | 1.9633860  |
| N (77)  | 9.2313000  | 9.8420000  | -1.3068000 | 1.3650340  | -2.8801810 | 0.4073030  |
| N (78)  | 10.7996000 | 14.5960000 | -0.3001000 | -0.5513580 | -7.4734060 | -0.5915070 |
| H (79)  | 10.9477000 | 15.4634000 | -0.2840000 | -0.7352830 | -8.4638830 | -0.6675090 |
| H (80)  | 11.1095000 | 14.0849000 | 0.3459000  | -1.2262970 | -6.8352990 | -1.0165730 |
| N (81)  | 7.9748000  | 5.7287000  | -1.3726000 | 2.1019590  | 1.1566780  | 1.3609560  |
| N (82)  | 6.2997000  | 1.0437000  | -2.5572000 | 3.5645710  | 5.3216450  | 3.8610170  |
| H (83)  | 6.0961000  | 0.1875000  | -2.5671000 | 3.7382040  | 6.2574080  | 4.2000460  |
| H (84)  | 6.0942000  | 1.5527000  | -3.2450000 | 3.9223870  | 4.5492830  | 4.4023080  |
| C (85)  | 10.7715000 | 7.2122000  | -2.6528000 | 4.5788720  | -1.2224160 | 1.3160120  |
| C (86)  | 12.0602000 | 6.9154000  | -3.3331000 | 6.0251790  | -1.0814530 | 0.9185930  |
| C (87)  | 13.1535000 | 6.5214000  | -2.5607000 | 6.3701030  | -0.6156680 | -0.3595090 |
| H (88)  | 13.0514000 | 6.4711000  | -1.6183000 | 5.5806770  | -0.3630500 | -1.0589270 |
| C (89)  | 14.3992000 | 6.1956000  | -3.1234000 | 7.7154380  | -0.4681580 | -0.7541710 |
| H (90)  | 15.1410000 | 5.9220000  | -2.5982000 | 7.9798490  | -0.1128530 | -1.7459110 |
| C (91)  | 14.4597000 | 6.2986000  | -4.4549000 | 8.6759320  | -0.8016150 | 0.1828590  |
| C (92)  | 15.1110000 | 6.2500000  | -6.5826000 | 10.6172950 | -1.0462620 | 1.3734150  |
| H (93)  | 15.6966000 | 6.9020000  | -7.0420000 | 11.4018600 | -1.7966010 | 1.3008290  |
| H (94)  | 15.1453000 | 5.3955000  | -7.0834000 | 10.9664560 | -0.1054920 | 1.8087190  |
| C (95)  | 13.4096000 | 6.7047000  | -5.2459000 | 8.3385300  | -1.2660460 | 1.4563430  |
| C (96)  | 12.1587000 | 7.0200000  | -4.7208000 | 7.0299710  | -1.4220760 | 1.8582250  |
| H (97)  | 11.4273000 | 7.2847000  | -5.2653000 | 6.7620990  | -1.7871950 | 2.8448890  |
| C (98)  | 6.0193000  | 8.7644000  | -1.9197000 | -0.8220800 | -0.4677800 | 2.0907020  |
| C (99)  | 4.9458000  | 9.2693000  | -2.8233000 | -1.9429750 | -0.8564950 | 2.9993280  |
| C (100) | 5.1659000  | 9.3307000  | -4.1872000 | -1.7359950 | -1.7988940 | 4.0185270  |
| H (101) | 6.0198000  | 9.0933000  | -4.5300000 | -0.7431730 | -2.2204550 | 4.1469880  |
| C (102) | 4.1566000  | 9.7354000  | -5.0806000 | -2.7880610 | -2.2059730 | 4.8632110  |
| H (103) | 4.3028000  | 9.7831000  | -6.0174000 | -2.6398820 | -2.9388490 | 5.6505890  |
| C (104) | 2.9610000  | 10.0563000 | -4.5179000 | -4.0248680 | -1.6290350 | 4.6353210  |
| C (105) | 0.8317000  | 10.6459000 | -4.1582000 | -6.2023520 | -0.9171800 | 4.7750130  |
| H (106) | 0.4806000  | 11.5713000 | -4.2006000 | -7.1104390 | -1.4422710 | 4.4852560  |
| H (107) | 0.0772000  | 10.0195000 | -4.2892000 | -6.3776060 | -0.1435940 | 5.5266350  |
| C (108) | 2.7330000  | 10.0231000 | -3.1540000 | -4.2323720 | -0.6924340 | 3.6190480  |
| C (109) | 3.7124000  | 9.6369000  | -2.2556000 | -3.2228070 | -0.2811610 | 2.7803370  |
| H (110) | 3.5605000  | 9.6201000  | -1.3179000 | -3.3911850 | 0.4233250  | 1.9681480  |
| C (111) | 8.8271000  | 10.6622000 | -2.2863000 | 1.7015560  | -3.7325360 | 1.4060970  |
| H (112) | 8.3208000  | 10.3005000 | -3.0039000 | 2.1958160  | -3.2925620 | 2.2670160  |
| C (113) | 9.1177000  | 12.0147000 | -2.2965000 | 1.4365220  | -5.0964500 | 1.3286180  |
| H (114) | 8.8132000  | 12.5613000 | -3.0115000 | 1.7215040  | -5.7630190 | 2.1360580  |

|         |            |            |            |           |            |            |
|---------|------------|------------|------------|-----------|------------|------------|
| C (115) | 9.8531000  | 12.5699000 | -1.2616000 | 0.7983810 | -5.6027870 | 0.1872370  |
| C (116) | 10.2938000 | 11.7085000 | -0.2626000 | 0.4719540 | -4.7210000 | -0.8514190 |
| H (117) | 10.8212000 | 12.0399000 | 0.4556000  | 0.0039020 | -5.0713350 | -1.7663800 |
| C (118) | 9.9580000  | 10.3634000 | -0.3205000 | 0.7714500 | -3.3657400 | -0.7047040 |
| H (119) | 10.2597000 | 9.7884000  | 0.3726000  | 0.5416470 | -2.6345230 | -1.4736200 |
| C (120) | 10.1062000 | 14.0560000 | -1.3042000 | 0.5257130 | -7.0853100 | 0.1148630  |
| C (121) | 7.2581000  | 5.2561000  | -2.3988000 | 1.9125230 | 1.4922410  | 2.6569090  |
| H (122) | 7.0020000  | 5.8595000  | -3.0854000 | 1.5200050 | 0.7126180  | 3.2994360  |
| C (123) | 6.8695000  | 3.9210000  | -2.5079000 | 2.1930980 | 2.7701470  | 3.1413460  |
| H (124) | 6.3553000  | 3.6223000  | -3.2498000 | 2.0146300 | 2.9971690  | 4.1883590  |
| C (125) | 7.2537000  | 3.0399000  | -1.5071000 | 2.6682980 | 3.7393390  | 2.2485260  |
| C (126) | 7.9806000  | 3.5281000  | -0.4330000 | 2.8550900 | 3.3939940  | 0.9037250  |
| H (127) | 8.2455000  | 2.9497000  | 0.2725000  | 3.2077110 | 4.1269610  | 0.1852410  |
| C (128) | 8.3156000  | 4.8683000  | -0.4006000 | 2.5787630 | 2.0892550  | 0.5033220  |
| H (129) | 8.8100000  | 5.1960000  | 0.3422000  | 2.7422630 | 1.7708980  | -0.5199560 |
| C (130) | 6.9159000  | 1.5680000  | -1.5037000 | 2.9389790 | 5.1527870  | 2.6851170  |

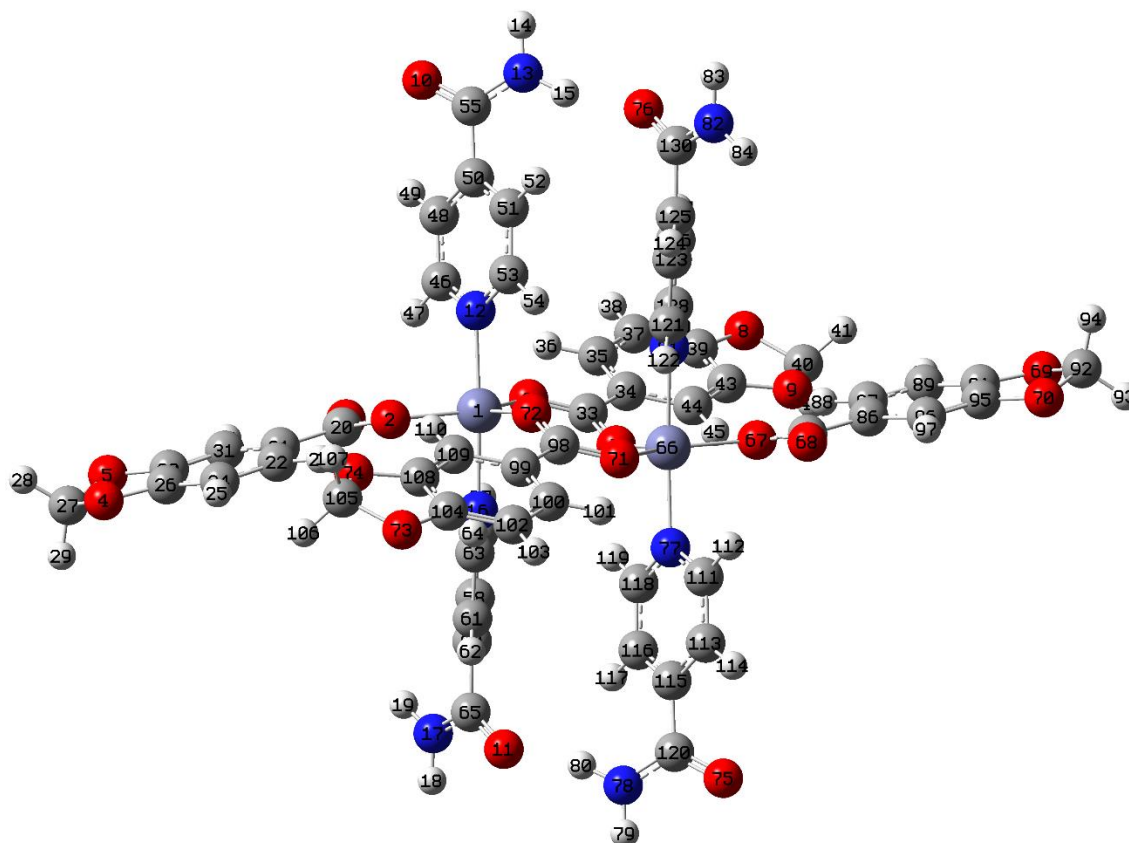

Figure S30. Optimized geometry of the dimer present in **2** in MeOH solution with labelling scheme.

Table S6. Cartesian coordinates from X-ray and optimized geometry of **3** in MeOH.

| Symbol<br>(label) | X-Ray structure |            |            | Optimized geometry |           |            |
|-------------------|-----------------|------------|------------|--------------------|-----------|------------|
|                   | X               | Y          | Z          | X                  | Y         | Z          |
| Cd (1)            | 6.4062000       | 10.0801000 | -1.0198000 | 1.4193230          | 0.1921700 | -1.1088940 |

|        |            |            |            |            |            |            |
|--------|------------|------------|------------|------------|------------|------------|
| O (2)  | 7.0042000  | 7.7323000  | -1.5676000 | 3.6801720  | 0.1358730  | -0.4577730 |
| O (3)  | 8.1108000  | 9.4414000  | -2.3992000 | 3.3662250  | -0.1561580 | -2.6532500 |
| O (4)  | 11.0189000 | 4.6992000  | -5.3538000 | 9.6925210  | -1.0519590 | -2.0126830 |
| O (5)  | 9.5918000  | 3.7591000  | -3.7881000 | 8.7907630  | -0.7473090 | 0.1315270  |
| O (6)  | 4.5677000  | 9.5055000  | 0.2911000  | 0.9297070  | 0.1151030  | 1.2121040  |
| O (7)  | 2.8282000  | 9.5355000  | 1.6258000  | -0.1785130 | -0.1141560 | 3.1370850  |
| O (8)  | 5.2138000  | 4.3895000  | -0.4128000 | 5.9155840  | -0.3026120 | 2.7740520  |
| O (9)  | 3.8126000  | 3.3102000  | 1.0986000  | 5.8950310  | -0.6019360 | 5.1002020  |
| O (10) | 1.0983000  | 10.0660000 | -6.0091000 | 1.4429420  | -6.9662600 | 0.0512420  |
| O (11) | 10.3533000 | 7.9527000  | 4.6143000  | 2.8380310  | 7.1770190  | 0.1594890  |
| N (12) | 4.9409000  | 10.0527000 | -2.8338000 | 1.3193830  | -2.1198530 | -1.1114640 |
| N (13) | 7.6931000  | 9.8688000  | 0.9015000  | 1.5873630  | 2.4927520  | -1.0284810 |
| C (14) | 7.9006000  | 8.1954000  | -2.3059000 | 4.1467350  | -0.1095870 | -1.6432160 |
| C (15) | 8.7705000  | 7.2827000  | -3.1038000 | 5.6137470  | -0.3565880 | -1.7915120 |
| C (16) | 9.6309000  | 7.8318000  | -4.0569000 | 6.1598550  | -0.5403200 | -3.0711680 |
| H (17) | 9.6714000  | 8.7769000  | -4.1528000 | 5.4892150  | -0.4906450 | -3.9249180 |
| C (18) | 10.4300000 | 7.0370000  | -4.8683000 | 7.5351760  | -0.7864500 | -3.2526390 |
| H (19) | 11.0160000 | 7.4124000  | -5.5150000 | 7.9729110  | -0.9218890 | -4.2374730 |
| C (20) | 10.3304000 | 5.6926000  | -4.6908000 | 8.3086920  | -0.8487210 | -2.1076040 |
| C (21) | 10.4501000 | 3.4748000  | -4.8801000 | 9.9734060  | -1.2101110 | -0.5858590 |
| H (22) | 9.9392000  | 3.0380000  | -5.6058000 | 10.1414160 | -2.2715610 | -0.3693900 |
| H (23) | 11.1701000 | 2.8586000  | -4.5922000 | 10.8278070 | -0.5893710 | -0.3171900 |
| C (24) | 9.4761000  | 5.1285000  | -3.7670000 | 7.7656880  | -0.6697830 | -0.8343420 |
| C (25) | 8.6809000  | 5.8956000  | -2.9433000 | 6.4273400  | -0.4147330 | -0.6326170 |
| H (26) | 8.1027000  | 5.5034000  | -2.2998000 | 6.0131110  | -0.2660830 | 0.3600170  |
| C (27) | 3.7026000  | 8.8948000  | 0.9930000  | 0.9312480  | -0.0642610 | 2.4916300  |
| C (28) | 3.7271000  | 7.4092000  | 1.0701000  | 2.2210590  | -0.2145540 | 3.2268080  |
| C (29) | 4.5663000  | 6.6816000  | 0.2248000  | 3.4391630  | -0.1853310 | 2.5039230  |
| H (30) | 5.1517000  | 7.1107000  | -0.3878000 | 3.4758670  | -0.0552580 | 1.4225310  |
| C (31) | 4.5034000  | 5.3111000  | 0.3232000  | 4.5901310  | -0.3381090 | 3.2415590  |
| C (32) | 4.7571000  | 3.1080000  | 0.0263000  | 6.7528220  | -0.6709700 | 3.9097200  |
| H (33) | 5.5218000  | 2.5659000  | 0.3461000  | 7.5660600  | 0.0465790  | 4.0096550  |
| H (34) | 4.3233000  | 2.6268000  | -0.7216000 | 7.1102650  | -1.6982430 | 3.7854540  |
| C (35) | 3.6715000  | 4.6716000  | 1.2122000  | 4.5836460  | -0.5050140 | 4.6262080  |
| C (36) | 2.8666000  | 5.3539000  | 2.0769000  | 3.4046670  | -0.5304980 | 5.3532650  |
| H (37) | 2.3159000  | 4.9043000  | 2.7072000  | 3.4091110  | -0.6564210 | 6.4320460  |
| C (38) | 2.8940000  | 6.7525000  | 1.9849000  | 2.2090850  | -0.3835520 | 4.6232480  |
| H (39) | 2.3346000  | 7.2660000  | 2.5550000  | 1.2486370  | -0.3998710 | 5.1315440  |
| C (40) | 3.7400000  | 9.4531000  | -2.8392000 | 1.5998290  | -2.8002260 | 0.0231200  |
| H (41) | 3.4933000  | 8.9169000  | -2.0936000 | 1.7904790  | -2.1958990 | 0.9032350  |
| C (42) | 2.8486000  | 9.5867000  | -3.8843000 | 1.6312210  | -4.1902880 | 0.0535980  |
| H (43) | 2.0081000  | 9.1449000  | -3.8583000 | 1.8478750  | -4.7277830 | 0.9713850  |
| C (44) | 3.1938000  | 10.3710000 | -4.9733000 | 1.3667240  | -4.9053780 | -1.1242840 |
| C (45) | 4.4590000  | 10.9272000 | -5.0065000 | 1.0977410  | -4.1912540 | -2.3015080 |
| H (46) | 4.7515000  | 11.4241000 | -5.7605000 | 0.8880820  | -4.6976610 | -3.2389980 |
| C (47) | 5.2952000  | 10.7433000 | -3.9067000 | 1.0851410  | -2.7945350 | -2.2576430 |
| H (48) | 6.1619000  | 11.1314000 | -3.9270000 | 0.8863500  | -2.1848780 | -3.1344260 |
| C (49) | 2.1761000  | 10.6185000 | -6.0614000 | 1.3529290  | -6.4127130 | -1.0566860 |
| C (50) | 2.5156000  | 11.5920000 | -7.1524000 | 1.1943550  | -7.2090670 | -2.3226640 |

|         |            |            |            |             |            |            |
|---------|------------|------------|------------|-------------|------------|------------|
| H (51)  | 3.3748000  | 11.3467000 | -7.5522000 | 1.9030340   | -6.8891150 | -3.0968840 |
| H (52)  | 2.5750000  | 12.4949000 | -6.7766000 | 0.1731160   | -7.0743970 | -2.7068100 |
| H (53)  | 1.8162000  | 11.5688000 | -7.8393000 | 1.3442960   | -8.2686080 | -2.0994600 |
| C (54)  | 8.7657000  | 10.6415000 | 1.1057000  | 1.1688920   | 3.2782280  | -2.0451710 |
| H (55)  | 8.9282000  | 11.3547000 | 0.5007000  | 0.6415510   | 2.7702970  | -2.8481600 |
| C (56)  | 9.6493000  | 10.4538000 | 2.1537000  | 1.4127910   | 4.6527360  | -2.0590620 |
| H (57)  | 10.4051000 | 11.0190000 | 2.2580000  | 1.0495710   | 5.2521460  | -2.8881700 |
| C (58)  | 9.4084000  | 9.4246000  | 3.0442000  | 2.1120530   | 5.2284360  | -0.9877670 |
| C (59)  | 8.2807000  | 8.6339000  | 2.8518000  | 2.5462190   | 4.4007450  | 0.0586600  |
| H (60)  | 8.0817000  | 7.9257000  | 3.4533000  | 3.0945050   | 4.8300700  | 0.8917100  |
| C (61)  | 7.4527000  | 8.8917000  | 1.7745000  | 2.2691790   | 3.0370920  | 0.0051890  |
| H (62)  | 6.6817000  | 8.3511000  | 1.6518000  | 2.5950130   | 2.3458460  | 0.7759590  |
| C (63)  | 10.3110000 | 9.1025000  | 4.2157000  | 2.3944690   | 6.7085690  | -0.9009830 |
| C (64)  | 11.4708000 | 9.9379000  | 4.4962000  | 2.1066990   | 7.5846490  | -2.0897210 |
| H (65)  | 12.0141000 | 10.0250000 | 3.6840000  | 2.5583610   | 7.1850020  | -3.0065470 |
| H (66)  | 12.0063000 | 9.5253000  | 5.2058000  | 2.4937500   | 8.5884390  | -1.8952840 |
| H (67)  | 11.1719000 | 10.8247000 | 4.7861000  | 1.0192610   | 7.6476980  | -2.2363190 |
| Cd (68) | 3.6625000  | 11.6975000 | 1.0198000  | -1.6791840  | 0.1354920  | 1.3078080  |
| O (69)  | 3.0645000  | 14.0454000 | 1.5676000  | -3.9096440  | 0.4291400  | 0.6421200  |
| O (70)  | 1.9579000  | 12.3363000 | 2.3992000  | -3.6448990  | -0.2402160 | 2.7586420  |
| O (71)  | -0.9502000 | 17.0784000 | 5.3538000  | -10.0241710 | -0.3670720 | 2.0526820  |
| O (72)  | 0.4769000  | 18.0186000 | 3.7881000  | -9.0793680  | 0.0951840  | -0.0429290 |
| O (73)  | 5.5009000  | 12.2722000 | -0.2911000 | -1.1263850  | 0.2921510  | -1.0487280 |
| O (74)  | 7.2405000  | 12.2421000 | -1.6258000 | -0.0438350  | 0.3440450  | -3.0000210 |
| O (75)  | 4.8549000  | 17.3882000 | 0.4128000  | -6.1379440  | 0.3508280  | -2.6003930 |
| O (76)  | 6.2560000  | 18.4675000 | -1.0986000 | -6.1399260  | 0.3618470  | -4.9481940 |
| O (77)  | 8.9704000  | 11.7117000 | 6.0091000  | -0.6206260  | 7.0806630  | -0.2964160 |
| O (78)  | -0.2846000 | 13.8250000 | -4.6143000 | -1.7722690  | -6.7536840 | -0.9432750 |
| N (79)  | 5.1278000  | 11.7250000 | 2.8338000  | -1.3733490  | 2.4204970  | 1.3101550  |
| N (80)  | 2.3756000  | 11.9089000 | -0.9015000 | -1.6738530  | -2.1481660 | 0.9571080  |
| C (81)  | 2.1681000  | 13.5823000 | 2.3059000  | -4.4110480  | 0.0496700  | 1.7767150  |
| C (82)  | 1.2982000  | 14.4950000 | 3.1038000  | -5.8954460  | -0.0584730 | 1.9019530  |
| C (83)  | 0.4378000  | 13.9459000 | 4.0569000  | -6.4669780  | -0.3450000 | 3.1514670  |
| H (84)  | 0.3973000  | 13.0008000 | 4.1528000  | -5.8014230  | -0.4796170 | 3.9999350  |
| C (85)  | -0.3613000 | 14.7406000 | 4.8683000  | -7.8621430  | -0.4595860 | 3.3097160  |
| H (86)  | -0.9474000 | 14.3652000 | 5.5150000  | -8.3180420  | -0.6852700 | 4.2694050  |
| C (87)  | -0.2617000 | 16.0851000 | 4.6908000  | -8.6308020  | -0.2720680 | 2.1750650  |
| C (88)  | -0.3814000 | 18.3029000 | 4.8801000  | -10.3336170 | 0.0989010  | 0.7011280  |
| H (89)  | 0.1295000  | 18.7397000 | 5.6058000  | -10.7245910 | 1.1217340  | 0.7555990  |
| H (90)  | -1.1014000 | 18.9190000 | 4.5922000  | -11.0351410 | -0.5921840 | 0.2349660  |
| C (91)  | 0.5926000  | 16.6491000 | 3.7670000  | -8.0627300  | 0.0098680  | 0.9316250  |
| C (92)  | 1.3877000  | 15.8821000 | 2.9433000  | -6.7020240  | 0.1202810  | 0.7506960  |
| H (93)  | 1.9660000  | 16.2743000 | 2.2998000  | -6.2657390  | 0.3239230  | -0.2223490 |
| C (94)  | 6.3661000  | 12.8829000 | -0.9930000 | -1.1459940  | 0.3325800  | -2.3427420 |
| C (95)  | 6.3416000  | 14.3685000 | -1.0701000 | -2.4457800  | 0.3510420  | -3.0745690 |
| C (96)  | 5.5023000  | 15.0960000 | -0.2248000 | -3.6585440  | 0.3541430  | -2.3422060 |
| H (97)  | 4.9170000  | 14.6669000 | 0.3878000  | -3.6865020  | 0.3512770  | -1.2528840 |
| C (98)  | 5.5653000  | 16.4665000 | -0.3232000 | -4.8183580  | 0.3731680  | -3.0822100 |
| C (99)  | 5.3116000  | 18.6697000 | -0.0263000 | -7.0037630  | 0.4888200  | -3.7665890 |

|         |            |            |            |            |            |            |
|---------|------------|------------|------------|------------|------------|------------|
| H (100) | 4.5469000  | 19.2117000 | -0.3461000 | -7.7398270 | -0.3149200 | -3.7698290 |
| H (101) | 5.7454000  | 19.1509000 | 0.7216000  | -7.4651420 | 1.4808340  | -3.7658890 |
| C (102) | 6.3972000  | 17.1061000 | -1.2122000 | -4.8248300 | 0.3742540  | -4.4765650 |
| C (103) | 7.2021000  | 16.4238000 | -2.0769000 | -3.6509760 | 0.3667410  | -5.2123810 |
| H (104) | 7.7528000  | 16.8733000 | -2.7072000 | -3.6655400 | 0.3656800  | -6.2983800 |
| C (105) | 7.1747000  | 15.0252000 | -1.9849000 | -2.4473650 | 0.3575700  | -4.4814100 |
| H (106) | 7.7340000  | 14.5117000 | -2.5550000 | -1.4906300 | 0.3549190  | -4.9968200 |
| C (107) | 6.3287000  | 12.3246000 | 2.8392000  | -1.8072140 | 3.1037080  | 0.2274620  |
| H (108) | 6.5753000  | 12.8607000 | 2.0936000  | -2.3750320 | 2.5319690  | -0.4988860 |
| C (109) | 7.2200000  | 12.1909000 | 3.8843000  | -1.5254940 | 4.4568220  | 0.0579170  |
| H (110) | 8.0606000  | 12.6327000 | 3.8583000  | -1.8571790 | 4.9933940  | -0.8254300 |
| C (111) | 6.8748000  | 11.4067000 | 4.9733000  | -0.7907900 | 5.1296570  | 1.0454250  |
| C (112) | 5.6097000  | 10.8505000 | 5.0065000  | -0.3725350 | 4.4183100  | 2.1807960  |
| H (113) | 5.3172000  | 10.3536000 | 5.7605000  | 0.1981840  | 4.8945760  | 2.9727140  |
| C (114) | 4.7735000  | 11.0343000 | 3.9067000  | -0.6754420 | 3.0591620  | 2.2733560  |
| H (115) | 3.9068000  | 10.6462000 | 3.9270000  | -0.3608660 | 2.4500530  | 3.1162370  |
| C (116) | 7.8926000  | 11.1591000 | 6.0614000  | -0.4525180 | 6.5822950  | 0.8291810  |
| C (117) | 7.5531000  | 10.1857000 | 7.1524000  | 0.1123560  | 7.3894040  | 1.9661990  |
| H (118) | 6.6939000  | 10.4309000 | 7.5522000  | -0.4519960 | 7.2388560  | 2.8945530  |
| H (119) | 7.4936000  | 9.2828000  | 6.7766000  | 1.1579040  | 7.0945490  | 2.1403220  |
| H (120) | 8.2525000  | 10.2089000 | 7.8393000  | 0.1048840  | 8.4475250  | 1.6916540  |
| C (121) | 1.3030000  | 11.1362000 | -1.1057000 | -1.4401680 | -2.9921630 | 1.9855680  |
| H (122) | 1.1405000  | 10.4229000 | -0.5007000 | -1.2307970 | -2.5253930 | 2.9437480  |
| C (123) | 0.4193000  | 11.3239000 | -2.1537000 | -1.4581080 | -4.3787860 | 1.8143450  |
| H (124) | -0.3364000 | 10.7586000 | -2.2580000 | -1.2482100 | -5.0237530 | 2.6625390  |
| C (125) | 0.6602000  | 12.3530000 | -3.0442000 | -1.7276740 | -4.9023530 | 0.5408480  |
| C (126) | 1.7880000  | 13.1437000 | -2.8518000 | -1.9938640 | -4.0140370 | -0.5118550 |
| H (127) | 1.9870000  | 13.8520000 | -3.4533000 | -2.2099720 | -4.4028770 | -1.5018460 |
| C (128) | 2.6160000  | 12.8860000 | -1.7745000 | -1.9606480 | -2.6453490 | -0.2675080 |
| H (129) | 3.3870000  | 13.4265000 | -1.6518000 | -2.1467440 | -1.9120890 | -1.0440120 |
| C (130) | -0.2423000 | 12.6752000 | -4.2157000 | -1.7057180 | -6.3804090 | 0.2393740  |
| C (131) | -1.4021000 | 11.8398000 | -4.4962000 | -1.5630990 | -7.3657230 | 1.3666070  |
| H (132) | -1.9454000 | 11.7527000 | -3.6840000 | -2.2662220 | -7.1586030 | 2.1828590  |



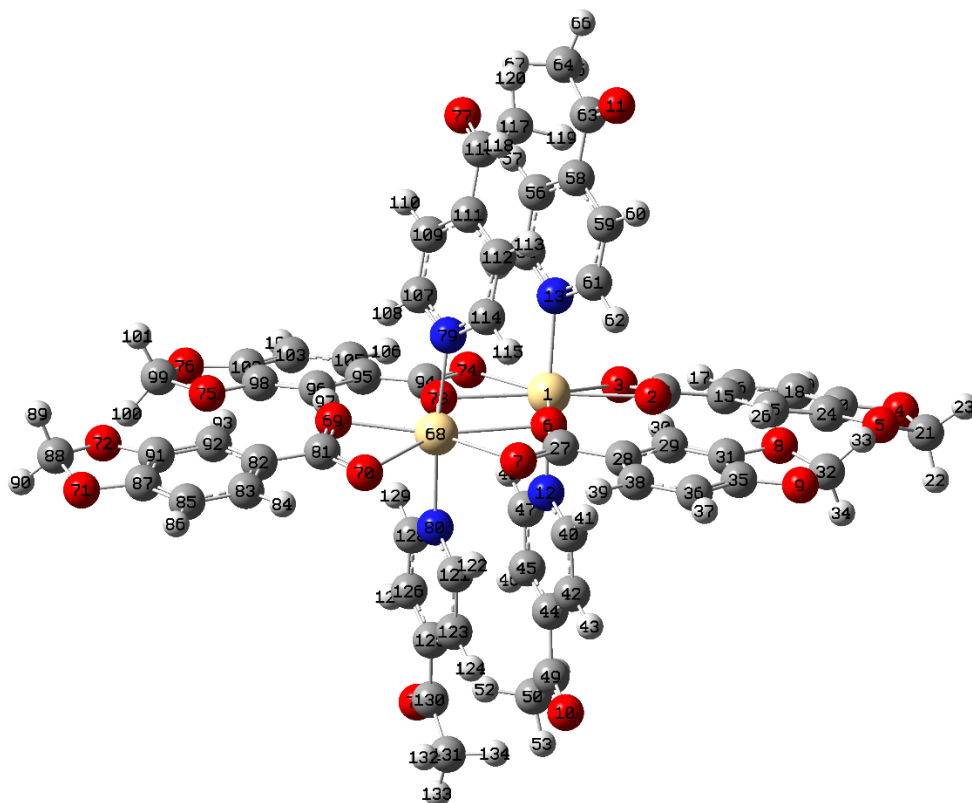

Figure S31. Optimized geometry of **3** in MeOH solution with labelling scheme.

Table S7. Cartesian coordinates from X-ray and optimized geometry of **4** in MeOH.

| Symbol<br>(label) | X-Ray structure |            |            | Optimized geometry |            |            |
|-------------------|-----------------|------------|------------|--------------------|------------|------------|
|                   | X               | Y          | Z          | X                  | Y          | Z          |
| Cd (1)            | 4.5049000       | 13.5467000 | 6.4296000  | 1.4262150          | 0.1265300  | -1.0268780 |
| O (2)             | 3.9192000       | 13.7625000 | 8.7744000  | 3.6021480          | -0.6554700 | -0.6077800 |
| O (3)             | 2.3180000       | 13.6043000 | 7.2990000  | 3.4212540          | -0.0864560 | -2.7698980 |
| O (4)             | -0.9570000      | 14.1009000 | 12.7000000 | 9.5246710          | -2.0470580 | -2.2943980 |
| O (5)             | 1.2992000       | 14.0321000 | 13.2350000 | 8.5724680          | -2.1228350 | -0.1533970 |
| O (6)             | 6.7941000       | 13.5967000 | 6.8979000  | 0.9656140          | -0.2766990 | 1.2354450  |
| O (7)             | 8.9795000       | 13.4903000 | 6.6660000  | -0.0922990         | -0.2686000 | 3.1988350  |
| O (8)             | 6.3176000       | 13.5727000 | 12.0848000 | 5.8630790          | -1.5243990 | 2.5972340  |
| O (9)             | 8.4643000       | 13.5782000 | 12.9590000 | 5.9042830          | -1.7244550 | 4.9335870  |
| O (10)            | 3.7934000       | 20.7274000 | 5.8231000  | -1.6177220         | -6.2346150 | -2.7622280 |
| O (11)            | 5.3151000       | 6.3846000  | 7.4302000  | 5.4922970          | 5.9696030  | 0.1074480  |
| N (12)            | 4.6368000       | 15.8739000 | 6.4571000  | 0.8000570          | -2.0430870 | -1.4723440 |
| N (13)            | 5.5076000       | 20.8236000 | 7.3003000  | 0.2388230          | -7.0816140 | -1.7261850 |
| H (14)            | 5.5063000       | 21.7034000 | 7.3140000  | -0.0953350         | -8.0285900 | -1.8306790 |
| H (15)            | 6.0858000       | 20.3766000 | 7.7904000  | 1.1477960          | -6.9446560 | -1.3124640 |
| N (16)            | 4.6282000       | 11.2441000 | 6.4792000  | 2.1970580          | 2.2553730  | -0.5997650 |
| N (17)            | 4.1116000       | 6.2932000  | 5.5460000  | 3.6139570          | 7.1322600  | -0.5039300 |
| H (18)            | 4.1536000       | 5.4148000  | 5.5138000  | 4.1157050          | 8.0073400  | -0.4526680 |
| H (19)            | 3.6786000       | 6.7362000  | 4.9211000  | 2.6026820          | 7.1619760  | -0.6293230 |
| C (20)            | 2.7012000       | 13.7433000 | 8.4891000  | 4.1141150          | -0.5267220 | -1.7907500 |

|         |            |            |            |             |            |            |
|---------|------------|------------|------------|-------------|------------|------------|
| C (21)  | 1.6869000  | 13.8594000 | 9.5791000  | 5.5508600   | -0.9094450 | -1.9786620 |
| C (22)  | 0.3336000  | 13.9381000 | 9.2681000  | 6.1270380   | -0.8688660 | -3.2579780 |
| H (23)  | 0.0703000  | 13.9282000 | 8.3552000  | 5.5118940   | -0.5505620 | -4.0951220 |
| C (24)  | -0.6476000 | 14.0308000 | 10.2504000 | 7.4735560   | -1.2287430 | -3.4709190 |
| H (25)  | -1.5696000 | 14.1016000 | 10.0345000 | 7.9232990   | -1.2071580 | -4.4593070 |
| C (26)  | -0.2067000 | 14.0153000 | 11.5456000 | 8.1952240   | -1.6129170 | -2.3551980 |
| C (27)  | -0.0543000 | 13.8111000 | 13.7601000 | 9.8517590   | -2.1429730 | -0.8657430 |
| H (28)  | -0.1601000 | 12.8726000 | 14.0564000 | 10.4457500  | -1.2717690 | -0.5750470 |
| H (29)  | -0.2260000 | 14.4073000 | 14.5318000 | 10.3595750  | -3.0859310 | -0.6746710 |
| C (30)  | 1.1249000  | 13.9564000 | 11.8622000 | 7.6253220   | -1.6508770 | -1.0805740 |
| C (31)  | 2.1192000  | 13.8734000 | 10.9105000 | 6.3100600   | -1.3131510 | -0.8509390 |
| H (32)  | 3.0392000  | 13.8271000 | 11.1436000 | 5.8715400   | -1.3500850 | 0.1420250  |
| C (33)  | 7.9627000  | 13.5661000 | 7.3826000  | 0.9864880   | -0.4305040 | 2.5134860  |
| C (34)  | 8.1312000  | 13.6234000 | 8.8805000  | 2.2608050   | -0.7838490 | 3.2028260  |
| C (35)  | 7.0036000  | 13.6031000 | 9.7133000  | 3.4296320   | -0.9915950 | 2.4274080  |
| H (36)  | 6.1202000  | 13.5806000 | 9.3634000  | 3.4277450   | -0.9003580 | 1.3423880  |
| C (37)  | 7.2502000  | 13.6173000 | 11.0640000 | 4.5741870   | -1.3142140 | 3.1193220  |
| C (38)  | 7.0519000  | 13.6156000 | 13.2922000 | 6.6773220   | -2.0069690 | 3.7146180  |
| H (39)  | 6.8151000  | 12.8422000 | 13.8624000 | 7.6145820   | -1.4553940 | 3.7467770  |
| H (40)  | 6.8409000  | 14.4466000 | 13.7887000 | 6.8200220   | -3.0870560 | 3.6242550  |
| C (41)  | 8.5273000  | 13.6329000 | 11.5873000 | 4.6065440   | -1.4257480 | 4.5103370  |
| C (42)  | 9.6300000  | 13.6813000 | 10.7945000 | 3.4793340   | -1.2219660 | 5.2878790  |
| H (43)  | 10.5028000 | 13.7179000 | 11.1679000 | 3.5119180   | -1.3064710 | 6.3700410  |
| C (44)  | 9.4354000  | 13.6744000 | 9.4066000  | 2.2911200   | -0.8984200 | 4.6033880  |
| H (45)  | 10.1824000 | 13.7058000 | 8.8215000  | 1.3740830   | -0.7318740 | 5.1611300  |
| C (46)  | 3.8042000  | 16.5918000 | 5.7135000  | 0.1814450   | -2.3793310 | -2.6285820 |
| H (47)  | 3.1928000  | 16.1386000 | 5.1450000  | 0.0258720   | -1.5760540 | -3.3422070 |
| C (48)  | 3.7937000  | 17.9755000 | 5.7349000  | -0.2429070  | -3.6806090 | -2.8829700 |
| H (49)  | 3.1776000  | 18.4572000 | 5.1946000  | -0.7571880  | -3.9245070 | -3.8069040 |
| C (50)  | 4.6748000  | 18.6452000 | 6.5399000  | -0.0105340  | -4.6683250 | -1.9165390 |
| C (51)  | 5.5595000  | 17.9087000 | 7.3098000  | 0.6334850   | -4.3170060 | -0.7223520 |
| H (52)  | 6.1956000  | 18.3396000 | 7.8678000  | 0.8030560   | -5.0419430 | 0.0685090  |
| C (53)  | 5.4898000  | 16.5224000 | 7.2445000  | 1.0219230   | -2.9906060 | -0.5349170 |
| H (54)  | 6.0797000  | 16.0139000 | 7.7880000  | 1.5041600   | -2.6583780 | 0.3783830  |
| C (55)  | 4.6375000  | 20.1713000 | 6.5407000  | -0.5243450  | -6.0618400 | -2.1683640 |
| C (56)  | 5.5227000  | 10.5561000 | 7.2204000  | 3.1264380   | 2.4401690  | 0.3698160  |
| H (57)  | 6.1524000  | 11.0411000 | 7.7399000  | 3.3237630   | 1.5905940  | 1.0153690  |
| C (58)  | 5.5578000  | 9.1712000  | 7.2548000  | 3.8035260   | 3.6477820  | 0.5171900  |
| H (59)  | 6.1975000  | 8.7181000  | 7.7913000  | 4.5588610   | 3.7665160  | 1.2872890  |
| C (60)  | 4.6432000  | 8.4559000  | 6.4926000  | 3.5052000   | 4.7050350  | -0.3545530 |
| C (61)  | 3.7081000  | 9.1611000  | 5.7322000  | 2.5355290   | 4.5130930  | -1.3476200 |
| H (62)  | 3.0643000  | 8.7015000  | 5.2057000  | 2.2777090   | 5.3001760  | -2.0482900 |
| C (63)  | 3.7395000  | 10.5466000 | 5.7633000  | 1.9043190   | 3.2726510  | -1.4420650 |
| H (64)  | 3.0972000  | 11.0244000 | 5.2510000  | 1.1610180   | 3.0600730  | -2.2041690 |
| C (65)  | 4.6906000  | 6.9377000  | 6.5191000  | 4.2810360   | 5.9934500  | -0.2296790 |
| Cd (66) | 7.8389000  | 13.5467000 | 4.6007000  | -1.5801250  | 0.2619940  | 1.4000260  |
| O (67)  | 8.4247000  | 13.7625000 | 2.2559000  | -3.8102140  | 0.6584960  | 0.9524600  |
| O (68)  | 10.0259000 | 13.6043000 | 3.7313000  | -3.7863260  | -0.2262660 | 3.0203690  |
| O (69)  | 13.3009000 | 14.1009000 | -1.6698000 | -10.0544410 | -0.0910160 | 1.6761900  |

|         |            |            |            |             |            |            |
|---------|------------|------------|------------|-------------|------------|------------|
| O (70)  | 11.0446000 | 14.0321000 | -2.2047000 | -8.9071620  | 0.7201250  | -0.1997390 |
| O (71)  | 5.5498000  | 13.5967000 | 4.1324000  | -1.1444890  | 0.4661380  | -0.9431390 |
| O (72)  | 3.3644000  | 13.4903000 | 4.3642000  | 0.0149590   | 1.0193760  | -2.7685840 |
| O (73)  | 6.0263000  | 13.5727000 | -1.0545000 | -6.0341890  | 1.7598270  | -2.2947740 |
| O (74)  | 3.8795000  | 13.5782000 | -1.9288000 | -5.9737000  | 2.4549170  | -4.5318950 |
| O (75)  | 8.5504000  | 20.7274000 | 5.2072000  | -2.3696650  | -6.9763050 | 0.7432150  |
| O (76)  | 7.0288000  | 6.3846000  | 3.6001000  | 0.7528730   | 6.9106250  | -0.2213710 |
| N (77)  | 7.7071000  | 15.8739000 | 4.5732000  | -1.9228270  | -1.9738390 | 0.9394340  |
| N (78)  | 6.8363000  | 20.8236000 | 3.7300000  | -4.2566920  | -6.2788660 | -0.3481200 |
| H (79)  | 6.8375000  | 21.7034000 | 3.7162000  | -4.5396210  | -7.2294710 | -0.5366530 |
| H (80)  | 6.2580000  | 20.3766000 | 3.2399000  | -4.8722480  | -5.5357180 | -0.6394140 |
| N (81)  | 7.7157000  | 11.2441000 | 4.5511000  | -0.9222740  | 2.4696640  | 1.4068920  |
| N (82)  | 8.2323000  | 6.2932000  | 5.4843000  | 0.9822610   | 7.1256790  | 2.0409810  |
| H (83)  | 8.1903000  | 5.4148000  | 5.5165000  | 1.3886330   | 8.0452700  | 1.9405440  |
| H (84)  | 8.6653000  | 6.7362000  | 6.1092000  | 0.8094680   | 6.7885020  | 2.9757930  |
| C (85)  | 9.6427000  | 13.7433000 | 2.5412000  | -4.4236710  | 0.1829630  | 1.9969380  |
| C (86)  | 10.6570000 | 13.8594000 | 1.4511000  | -5.9216930  | 0.1032140  | 1.9564110  |
| C (87)  | 12.0102000 | 13.9381000 | 1.7622000  | -6.6177480  | -0.3866880 | 3.0734820  |
| H (88)  | 12.2736000 | 13.9282000 | 2.6751000  | -6.0471130  | -0.6947550 | 3.9449080  |
| C (89)  | 12.9915000 | 14.0308000 | 0.7798000  | -8.0236340  | -0.4844550 | 3.0828680  |
| H (90)  | 13.9135000 | 14.1016000 | 0.9957000  | -8.5661300  | -0.8682190 | 3.9419850  |
| C (91)  | 12.5506000 | 14.0153000 | -0.5153000 | -8.6798820  | -0.0667100 | 1.9392960  |
| C (92)  | 12.3981000 | 13.8111000 | -2.7298000 | -10.2342980 | 0.6354890  | 0.4128500  |
| H (93)  | 12.5040000 | 12.8726000 | -3.0262000 | -10.6026200 | 1.6427580  | 0.6279040  |
| H (94)  | 12.5698000 | 14.4073000 | -3.5015000 | -10.8993190 | 0.0702850  | -0.2366030 |
| C (95)  | 11.2189000 | 13.9564000 | -0.8319000 | -7.9915310  | 0.4218670  | 0.8267320  |
| C (96)  | 10.2246000 | 13.8734000 | 0.1198000  | -6.6172510  | 0.5181360  | 0.7928820  |
| H (97)  | 9.3047000  | 13.8271000 | -0.1133000 | -6.0935550  | 0.8938410  | -0.0804570 |
| C (98)  | 4.3812000  | 13.5661000 | 3.6477000  | -1.1073130  | 0.9244020  | -2.1466110 |
| C (99)  | 4.2126000  | 13.6234000 | 2.1498000  | -2.3713800  | 1.3323960  | -2.8250940 |
| C (100) | 5.3403000  | 13.6031000 | 1.3170000  | -3.5914860  | 1.2814270  | -2.1035750 |
| H (101) | 6.2237000  | 13.5806000 | 1.6669000  | -3.6336580  | 0.9664020  | -1.0610560 |
| C (102) | 5.0937000  | 13.6173000 | -0.0338000 | -4.7210270  | 1.6690460  | -2.7875670 |
| C (103) | 5.2919000  | 13.6156000 | -2.2619000 | -6.8831360  | 2.0362970  | -3.4549750 |
| H (104) | 5.5288000  | 12.8422000 | -2.8321000 | -7.5643540  | 2.8516350  | -3.2212400 |
| H (105) | 5.5029000  | 14.4466000 | -2.7584000 | -7.3995900  | 1.1213390  | -3.7573020 |
| C (106) | 3.8165000  | 13.6329000 | -0.5570000 | -4.6888420  | 2.0944630  | -4.1168570 |
| C (107) | 2.7139000  | 13.6813000 | 0.2358000  | -3.5089800  | 2.1577380  | -4.8375320 |
| H (108) | 1.8410000  | 13.7179000 | -0.1377000 | -3.4896180  | 2.4951680  | -5.8694970 |
| C (109) | 2.9085000  | 13.6744000 | 1.6237000  | -2.3371580  | 1.7640580  | -4.1620710 |
| H (110) | 2.1615000  | 13.7058000 | 2.2088000  | -1.3811380  | 1.7903770  | -4.6768730 |
| C (111) | 8.5396000  | 16.5918000 | 5.3168000  | -1.7095680  | -2.9148740 | 1.8892540  |
| H (112) | 9.1510000  | 16.1386000 | 5.8853000  | -1.2375060  | -2.5725350 | 2.8048610  |
| C (113) | 8.5502000  | 17.9755000 | 5.2954000  | -2.0788690  | -4.2445840 | 1.7027870  |
| H (114) | 9.1662000  | 18.4572000 | 5.8357000  | -1.8865620  | -4.9849220 | 2.4726630  |
| C (115) | 7.6691000  | 18.6452000 | 4.4904000  | -2.7070080  | -4.6108540 | 0.5048610  |
| C (116) | 6.7844000  | 17.9087000 | 3.7205000  | -2.9145070  | -3.6365100 | -0.4812420 |
| H (117) | 6.1483000  | 18.3396000 | 3.1625000  | -3.3560610  | -3.8853160 | -1.4418930 |
| C (118) | 6.8540000  | 16.5224000 | 3.7858000  | -2.5039130  | -2.3273020 | -0.2289570 |

|         |           |            |           |            |            |            |
|---------|-----------|------------|-----------|------------|------------|------------|
| H (119) | 6.2641000 | 16.0139000 | 3.2422000 | -2.6213890 | -1.5356330 | -0.9614580 |
| C (120) | 7.7063000 | 20.1713000 | 4.4895000 | -3.0982340 | -6.0522250 | 0.3045400  |
| C (121) | 6.8211000 | 10.5561000 | 3.8099000 | -1.4157770 | 3.2973590  | 0.4543920  |
| H (122) | 6.1914000 | 11.0411000 | 3.2904000 | -2.1983510 | 2.8931300  | -0.1786070 |
| C (123) | 6.7860000 | 9.1712000  | 3.7754000 | -0.9404850 | 4.5948030  | 0.2880410  |
| H (124) | 6.1464000 | 8.7181000  | 3.2390000 | -1.3359260 | 5.2317660  | -0.4963280 |
| C (125) | 7.7006000 | 8.4559000  | 4.5376000 | 0.0661850  | 5.0591460  | 1.1454710  |
| C (126) | 8.6358000 | 9.1611000  | 5.2981000 | 0.5695660  | 4.2041950  | 2.1347400  |
| H (127) | 9.2796000 | 8.7015000  | 5.8246000 | 1.3707550  | 4.5087330  | 2.8018530  |
| C (128) | 8.6044000 | 10.5466000 | 5.2670000 | 0.0496000  | 2.9137500  | 2.2330890  |
| H (129) | 9.2467000 | 11.0244000 | 5.7793000 | 0.4086940  | 2.2132500  | 2.9796000  |
| C (130) | 7.6533000 | 6.9377000  | 4.5112000 | 0.6179490  | 6.4427110  | 0.9432300  |

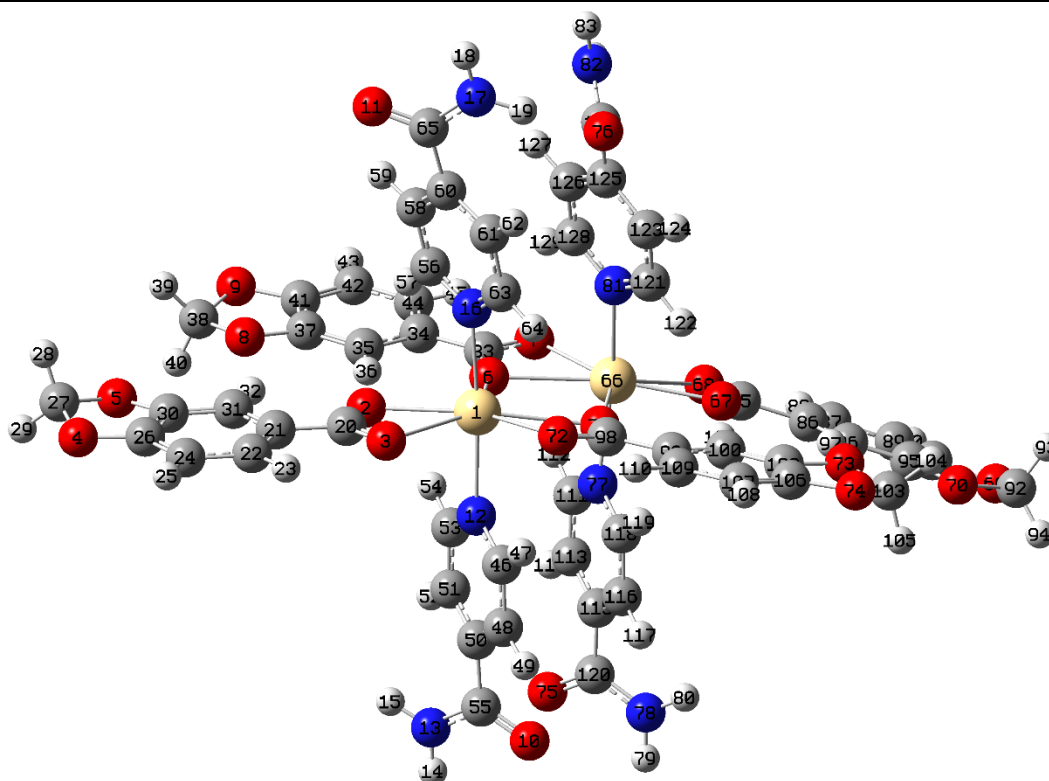

Figure S32. Optimized geometry of **4** in MeOH solution with labelling scheme.

## References

- (1) Pinsky, M.; Avnir, D. Continuous Symmetry Measures. 5. The Classical Polyhedra. *Inorg. Chem.* **1998**, *37*, 5575–5582.
- (2) Llunell, M.; Casanova, D.; Cirera, J.; Bofill, J. M.; Alemany, P.; Alvarez, S.; Pinsky, M.; Avnir, D. SHAPE Version 2.1. Universitat de Barcelona and The Hebrew University of Jerusalem 2013.
